# Cell-cell metabolite exchange creates a pro-survival metabolic environment that extends lifespan

Clara Correia-Melo<sup>#1,2,3</sup>, Stephan Kamrad<sup>1</sup>, Christoph B. Messner<sup>1</sup>, Roland Tengölics<sup>4,5</sup>, Lucía Herrera-Dominguez<sup>1,3</sup>, St John Townsend<sup>1,3</sup>, Mohammad Tauqeer Alam<sup>6</sup>, Anja Freiwald<sup>7</sup>, Kate Campbell<sup>2</sup>, Simran Aulakh<sup>1</sup>, Lukasz Szyrwił<sup>1,3</sup>, Jason S. L. Yu<sup>1</sup>, Aleksej Zelezniak<sup>1,8,19,10</sup>, Vadim Demichev<sup>1,2,3</sup>, Michael Muelleder<sup>7</sup>, Balázs Papp<sup>4,5</sup>, and Markus Ralser<sup>#1,3</sup>

# Corresponding authors CC-M ([clara.correia-melo@charite.de](mailto:clara.correia-melo@charite.de)) & MR ([markus.ralser@charite.de](mailto:markus.ralser@charite.de))

- <sup>1</sup> The Molecular Biology of Metabolism Laboratory, The Francis Crick Institute, London, UK
- <sup>2</sup> Department of Biochemistry, University of Cambridge, Cambridge, UK
- <sup>3</sup> Department of Biochemistry, Charité University Medicine, Berlin, Germany
- <sup>4</sup> Synthetic and Systems Biology Unit, Institute of Biochemistry, Biological Research Centre, Eötvös Loránd Research Network; Szeged, Hungary
- <sup>5</sup> HCEMM-BRC Metabolic Systems Biology Lab; Szeged, Hungary
- <sup>6</sup> Department of Biology, College of Science, United Arab Emirates University, Al-Ain, UAE
- <sup>7</sup> Core Facility - High Throughput Mass Spectrometry, Charité University Medicine, Berlin, Germany
- <sup>8</sup> Department of Biology and Biological Engineering, Chalmers University of Technology, Kemivägen 10, SE-412 96, Gothenburg, Sweden
- <sup>9</sup> Science for Life Laboratory, Tomtebodavägen 23a, SE-171 65, Stockholm, Sweden
- <sup>10</sup> Institute of Biotechnology, Life Sciences Center, Vilnius University, Vilnius, Lithuania

## Abstract

Metabolism is fundamentally intertwined with the ageing process. We here report that a key determinant of cellular lifespan is not only nutrient supply and intracellular metabolism, but also metabolite exchange interactions that occur between cells. Studying chronological ageing in yeast, we observed that metabolites exported by young, exponentially growing, cells are re-imported during the stationary phase when cells age chronologically, indicating the existence of cross-generational metabolic interactions. We then used self-establishing metabolically cooperating communities (SeMeCos) to boost cell-cell metabolic interactions and observed a significant lifespan extension. A search for the underlying mechanisms, coupling SeMeCos, metabolic profiling, proteomics and genome-scale metabolic modelling, attributed a specific role to methionine consumer cells. These cells were enriched over time, adopted glycolytic metabolism and increased export of protective metabolites. Glycerol, in particular, accumulated in the communal metabolic environment and extended the lifespan of all cells in the community in a paracrine fashion. Our results hence establish metabolite exchange interactions as a determinant of the ageing process and show that metabolically cooperating cells shape their metabolic environment to achieve lifespan extension.

Keywords: Metabolite exchange interactions, yeast chronological ageing, self-generated metabolic microenvironment, organic sulphur cycle metabolites, eukaryotic cell physiology and longevity.

53

## 54 **Introduction**

55

56 Metabolism is interlinked with the ageing process and determines lifespan at multiple levels.  
 57 Processes driven or dependent on metabolism include cellular growth, ageing and death,  
 58 energy production and the formation of molecular building blocks required for cellular  
 59 homeostasis and repair, and even regulation of antimicrobial responses <sup>1–6</sup>. Moreover, metabolic  
 60 sensing and metabolic signalling systems that regulate cell growth and energy expenditure,  
 61 such as the AMPK, Sirtuin and mTOR pathways, are also central pathways regulating cellular  
 62 ageing and lifespan <sup>7–11</sup>. Indeed, metabolism is a source of both damaging and protective  
 63 molecules, and hence strongly intertwined with ageing processes. For example, metabolites like  
 64 NADPH and glutathione fuel the metabolic antioxidant machinery and protect cells from  
 65 oxidative damage that occurs during cellular ageing <sup>12</sup>. On the other end of the spectrum,  
 66 reactive products of metabolism such as methylglyoxal or superoxide, indiscriminately react and  
 67 damage cellular membranes, proteins and nucleic acids, accelerating cellular ageing  
 68 phenotypes <sup>13–15</sup>. As a consequence, metabolic activity that determines the equilibrium between  
 69 the levels of protective and damaging reactive molecules inside a cell is a critical determinant of  
 70 ageing and lifespan <sup>16,17</sup>.

71 Cellular metabolism not only occurs inside cells, it also involves the exchange of metabolites  
 72 between cells and tissues <sup>18–22</sup>. In microbes, metabolite exchange interactions are a result of  
 73 cells exporting metabolites into their surrounding and re-importing metabolites produced by  
 74 themselves or neighbouring cells. Metabolite exchange interactions can be costly for cells,  
 75 because the exported metabolites can be lost to competitors or diffusion <sup>23</sup>, but are critical for  
 76 cell growth and emerge for at least three reasons. First, the ability to uptake and exploit  
 77 metabolites that are available environmentally renders cells more competitive. This means cells  
 78 profit from possessing metabolite uptake systems even in situations where there are no  
 79 advantages to be gained from cell-cell cooperation <sup>21,24</sup>. Second, cells export metabolites for

80 many different reasons. For instance, the intracellular biochemical network needs constant  
81 balancing which is achieved through an overflow of metabolites <sup>20,25–27</sup>. The export of metabolites  
82 also mediates metabolic cooperation, a situation that can arise when unrelated biochemical  
83 reactions interfere and inhibit each other, and where smaller metabolic networks are more  
84 efficient <sup>28</sup>. Finally, the biosynthetic burden caused by expensive metabolic reactions can be  
85 mitigated through the sharing of labour. This helps cells to reduce energetic costs as well as the  
86 load of toxic intermediates <sup>21,29,30</sup>.

87 Intercellular metabolic interactions hence emerge because cells constantly export a broad range  
88 of metabolites and, at the same time, harbour an array of mechanisms which sense and uptake  
89 extracellular nutrients <sup>20,31–33</sup>. This situation has, however, a significant impact on cellular  
90 physiology. Once a cell has started to uptake extracellular metabolites, its own biosynthetic  
91 pathways typically become inhibited <sup>32,34</sup>. As a consequence, metabolic and physiological  
92 properties that also impact ageing, such as growth rate, stress tolerance, or the formation or  
93 consumption of metabolites such as NADPH, are altered depending on the uptake of  
94 metabolites <sup>32,35–38</sup>. For example, cells that uptake lysine from the environment mount better  
95 protection against oxidants, via increased pools of NADPH <sup>37</sup>, and cells that rely on the uptake  
96 of amino acids, including histidine, leucine, and methionine, are more drug tolerant <sup>38</sup>.

97 While there is an increasing understanding of the role of the metabolic environment in stress  
98 resilience and growth, the role of cell-cell metabolic interactions in the ageing process is still  
99 barely understood <sup>2</sup>. A measure of eukaryotic cell ageing is chronological lifespan (CLS) in  
100 yeast. CLS refers to post-mitotic cell ageing, assessed by the length of time quiescent (non-  
101 dividing) cells can survive post entry into the stationary phase <sup>39,40</sup>. CLS has been pivotal in the  
102 discovery of several of the most critical and conserved regulatory pathways of ageing that are  
103 now known to be important across eukaryotes, including the AMPK, mTOR and sirtuin pathways  
104 <sup>8–11</sup>. Monitoring metabolic consumption and production during CLS using metabolomics and  
105 isotope tracing experiments, we observe that metabolites exported by young, exponentially  
106 growing, cells are re-imported during the stationary phase when cells age chronologically,

indicating the existence of cross-generational metabolic interactions. As this result implied that metabolite exchange interactions could be impact CLS, we boosted metabolite export and metabolic interactions through the use of self-establishing metabolically cooperating (SeMeCo) communities, a yeast community model that allows the tracing of metabolite consumer or producer cells of four different metabolic pathways in their sixteen possible combinations (metabotypes)<sup>41</sup>. We observed a significant extension of the yeast chronological lifespan when cell-cell metabolic interactions are boosted. In the search for the underlying mechanisms, we coupled lifespan assays with proteomics, metabolomics and genome-scale metabolic flux analysis, and discovered a role for the extracellular metabolic environment that is created by the cooperating communities. We find that cells cooperating for the biosynthesis of methionine generate a protective metabolic environment, in which methionine consumers obtain a more glycolytic metabolism and overflow glycolytic products, glycerol in particular. The exometabolome created this way, in turn, extends the lifespan of all cells in the community via a paracrine effect. Our results show that widespread metabolome changes, occurring when cells cooperate metabolically, create a pro-survival metabolic environment leading to extension of their own lifespan. Ultimately, these findings establish cell-cell metabolic interactions and generated exometabolomes as a longevity modulating mechanism.

## Results

### ***Yeast cells establish cross-generational metabolite exchange interactions during chronologic ageing***

As cells sense extracellular metabolites and feedback inhibit their own metabolite synthesis pathways when grown in rich media<sup>25,31,34,41</sup>, we conducted CLS experiments using synthetic minimal (SM) growth media lacking amino acid and nucleotide supplements. We used a

common lab strain in which four artificially introduced metabolic biosynthetic deficiencies (auxotrophies) in three amino acids (*his3Δ1*, *leu2Δ*, *met15Δ*) and one nucleobase (*ura3Δ*)<sup>42</sup> were repaired through genomic integration of the wild-type alleles<sup>38</sup>.

The prototrophic cells, metabolically competent for the biosynthesis of the four metabolites (wild-type cells) were grown in batch culture through exponential, early stationary and stationary phases (1, 2 and 8 days of culture respectively) (**Fig 1a**). Initially, cells grow exponentially (E), consuming glucose supplemented to the culture media, followed by a decline in growth rate as cells transition from diauxic shift to stationary phase (early stationary phase, ES), and then enter stationary phase (S) once preferred carbon sources are exhausted. While exponential cells are mostly glycolytic, they then start consuming released products of glucose catabolism (like ethanol or glycerol) during the diauxic shift, before entering stationary phase, when cells arrest growth and mostly use oxidative phosphorylation to generate ATP (**Fig. 1a**). In order to evaluate the intracellular metabolome of chronologically ageing prototrophic cells, we used a targeted LC-MS/MS method<sup>43</sup>. The concentration profile of intracellular amino acids, nucleotides as well as glycolysis and tricarboxylic acid (TCA) intermediates was specific to the growth phase; the profiles clustered in a principal component analysis (PCA) according to growth phase (**Fig. 1b i**). The metabolite concentration changes measured reflected the known metabolic transitions from exponential to the stationary phase<sup>44–46</sup>. Consistent with a shift from fermentation to oxidative metabolism, the overall concentration of glycolytic metabolites decreased, while we detected an increase in the concentration of TCA derived metabolites (**Fig. 1b ii**). Moreover, reflecting the ceasing of growth, the concentration of nucleotides decreased during early stationary and stationary phases<sup>46</sup>. Interestingly, a differentiated picture was obtained for intracellular amino acids. While the concentration of overall amino acids did increase in the stationary phase, we observed a spread in the concentration range (**Fig. 1b ii**), unpaired two-sided Wilcoxon Rank Sum test and multiple testing correction using the Benjamini & Hochberg (BH) method, adjusted p-values in **Supplementary File 1**). For example, isoleucine, glycine and leucine increased from exponential to stationary phase, but aspartate, alanine and glutamate

decreased, most likely reflecting their role in interconversion reactions in the biosynthesis of other metabolites, including other amino acids and pyruvate (**Fig. 1c**), unpaired two-sided Wilcoxon Rank Sum test and multiple testing correction using the BH method, adjusted p-values in **Supplementary File 2**).

As amino acids can be exported by yeast cells into the surrounding environment <sup>25,41,47–49</sup>, we therefore continued our analysis with a quantification of the extracellular amino acid pools using a targeted LC-MS/MS method <sup>50</sup>. Despite having inoculated our cells in a minimal medium lacking amino acid supplements, we found that by mid-log phase (exponential phase) yeast cells had produced and exported amino acids to reach significant concentrations in the medium. Further, 14 of the 19 analysed amino acids are increased by more than >10% in the extracellular medium in the stationary compared to the exponential phase medium (**Fig. 1c inlet**). Indeed, only glutamate and aspartate were reduced in the extracellular metabolome of stationary cells when compared to the medium formed by exponential cells (**Fig. 1c**, unpaired two-sided Wilcoxon Rank sum test and multiple testing correction with BH method, adjusted p-values in **Supplementary File 2**). The source of these metabolites can be metabolite export as well as cell death in the stationary phase. As most of the metabolites were already increasingly detected in the exponential and early stationary phases where cell death is negligible (~95% live cells) (**Supplementary Fig. 2a**) and also because in stationary cultures, the concentration of metabolites did not correlate with the number of live cells (**Supplementary Fig. 2b**), we concluded that the main source of metabolites is export during the exponential and early stationary phases.

Amino acids are sensed and efficiently uptaken by actively growing yeast cells <sup>25,31,47</sup>. We therefore asked if cells during the stationary phase, no longer actively proliferating, would uptake the amino acids previously produced in the exponential phase (**Fig. 1d**). We exploited <sup>13</sup>C-glucose isotope labelling to test for the consumption, by stationary cells, of metabolites that had been produced during the exponential phase. We cultured wild-type yeast cells on SM media supplemented with <sup>12</sup>C-glucose or <sup>13</sup>C-glucose for 48h, a duration which ensured that the

glucose in the media had been exhausted - catabolized into unlabeled ( $^{12}\text{C}$ ) and labelled ( $^{13}\text{C}$ ) metabolites, respectively. Then we swapped the media between labelled and unlabelled cells. In parallel, we set control cultures growing on SM media supplemented with  $^{13}\text{C}$ -glucose, which were then swapped into SM media only supplemented with amino acids (without glucose), to allow distinguishing if intracellular amino acid levels were a direct result of import, or indirectly derived from catabolism of imported carbohydrates. Levels of fully labelled ( $^{13}\text{C}$ ) or unlabeled ( $^{12}\text{C}$ ) intracellular amino acids (from glucose catabolism) were quantified using a targeted LC-MS/MS method <sup>50</sup> (**Fig. 1e i**). Growth on SM media supplemented with  $^{12}\text{C}$ -glucose or  $^{13}\text{C}$ -glucose did not change cell growth parameters prior or post swap (**Supplementary Fig. 3a-b**, unpaired two-sided Wilcoxon Rank sum test; p-values are listed in **Supplementary File 3**). Notably, cells in exponential phase synthesise sufficient amounts of amino acids so that they can be exported and then uptaken by neighbouring cells, as shown by the increased intracellular levels of  $^{13}\text{C}$ - or  $^{12}\text{C}$ -containing amino acids in cultures initially grown on  $^{12}\text{C}$ - or  $^{13}\text{C}$ -glucose, respectively, or when unlabeled amino acids were added to cells previously cultured in  $^{13}\text{C}$ -glucose in the control cultures (**Fig. 1e ii**), **Supplementary Fig. 3c**). Hence amino acids that are produced and exported during the exponential growth phase are taken up by yeast cells during the stationary phase, indicating that yeast cells establish cross-generational metabolite exchange interactions during chronological ageing.

### ***Metabolite exchange interactions extend lifespan in yeast communities***

We next questioned what impact the exchange of metabolites might have on chronological lifespan. The export and import of metabolites cannot be prevented without imposing major metabolic constraints on cells. We overcame this issue by choosing to boost metabolite exchange interactions instead and made use of self-establishing metabolically cooperating communities (SeMeCos) <sup>41</sup>. SeMeCos exploit the segregation of plasmids that encode for



essential metabolic enzymes, to stochastically introduce auxotrophies (metabolic deficiencies), upon which cells can only continue proliferation by exchanging metabolites. Because plasmid segregation continues until a maximum amount of auxotrophic cells is reached, SeMeCos boost metabolite exchange interactions within the communities. Indeed, compared to wild-type cell communities, SeMeCos are characterised by increased metabolite export, an increase in extracellular metabolite concentrations, and increased metabolic interactions<sup>38</sup>. Despite boosting metabolite exchange interactions, SeMeCos still exploit the native metabolite export and import capacities of yeast cells and do not have artificially altered metabolic pathways or metabolite sensing properties<sup>38,41,51</sup> (**Fig. 2a**).

Analysing chronological lifespan of SeMeCos (**Fig. 2b**), we observed that in comparison to the isogenic wild-type strain, SeMeCos were long-lived, as assessed by monitoring colony forming units (CFUs) over time. SeMeCos lost more CFUs immediately after reaching the stationary phase, but in later time-points contained more CFUs and were alive after the wild-type cultures lost viability (**Fig. 2c**, unpaired two-sided *t*-test, *p*-value = 0.00661 at day 18 of culture; CLS *p*-values listed in **Supplementary File 4**). To have an independent assessment of survival, we also monitored cell viability using Live/Dead™ cell staining assays. At late timepoints, SeMeCos also contained significantly more viable cells (**Supplementary Fig. 4a**, unpaired two-sided *t*-test; CLS *p*-values listed in **Supplementary File 4**). Finally, we exploited the situation where due to the higher cell density and proximity, metabolite exchange is amplified in colonies compared to liquid cultures. Yeast cells survived much longer in colonies than in liquid culture (~65 vs 20 days). Moreover, also in the colony, SeMeCos had a significantly longer CLS than the isogenic wild-type cells (**Fig. 2c**, unpaired two-sided *t*-test, *p*-value = 0.0338 at day 65 of growth, CLS *p*-values listed in **Supplementary File 4**). We ruled out that the difference in lifespan between SeMeCos and wild-type was explained by differences in pH, a common confounder of lifespan experiments<sup>52</sup> (**Supplementary Fig. 4b**, unpaired two-sided *t*-test, *p*-values listed in **Supplementary File 5**). Moreover, our data suggests that SeMeCo cells were not long-lived due to amino acid starvation, a known lifespan extending intervention<sup>53</sup>. Indeed,

corresponding to the increased exchange of metabolites, the extracellular medium was more metabolite rich in stationary SeMeCos than in wild-type cells, including H, L, M and U (**Fig. 2d**, **Supplementary Fig. 5**, unpaired two-sided Wilcoxon Rank sum test and multiple testing correction BH method, adjusted p-values in **Supplementary File 6**).

### ***The lifespan extension in SeMeCos is mediated by a paracrine mechanism***

Next, we tested if the lifespan extension is associated with specific metabotypes, i. e. with specific metabolic dependencies between cells in a community. The SeMeCo model is based on the stochastic segregation of four plasmid-encoded auxotrophic marker enzymes (*HIS3*, *LEU2*, *URA3* and *MET15*) resulting in 16 metabotypes (metabolic genotypes, Fig. 2a) distinguishable by genetics. Because of the coupling to other metabolic processes, the 16 metabotypes are connected to broad changes in metabolism and, together, affect differential expression of 2/3rds of the genome<sup>54</sup>. We monitored occurrence and relative contributions of the different auxotrophies to the ageing SeMeCo cultures over time. Generally, we observed that the proportion of prototrophic cells declined over time and that during the late stationary phase ~98% of viable cells were auxotrophs. Among the auxotrophs, the *met15Δ* segregants dominated, and increased in relative abundance with time (**Fig. 3a**, paired two-sided *t*-test, p-values in **Supplementary File 7**).

To test the contribution of the individual auxotrophies to the lifespan extension, we next generated additional versions of the SeMeCo communities, in which each one of the auxotrophic markers (*HIS3*, *LEU2*, *URA3* or *MET15*) was genomically repaired, and hence, only three plasmids segregate ('3p-SeMeCos') (**Fig. 3b**). The genomic repair of *HIS3*, *LEU2* or *URA3* did not significantly change the lifespan of SeMeCos, whereas the 3p-SeMeco in which the *MET15* locus was no longer segregating had significantly shorter lifespan (**Fig. 3c**, unpaired two-sided Wilcoxon Rank sum test, p-value at day 20 of culture for: SeMeCo vs wt = 0.0294

SeMeCo vs *HIS3*-SeMeCo = 0.3428, SeMeCo vs *LEU2*-SeMeCo = 0.3428, SeMeCo vs *URA3*-SeMeCo = 0.2000, SeMeCo vs *MET15*-SeMeCo = 0.0210; p-values across CLSs are listed in **Supplementary File 8**). Moreover, SeMeCos that only segregate the *MET15* marker (pM-SeMeCo) also had increased lifespan compared to wild-type communities (**Supplementary Fig. 6**, unpaired two-sided Wilcoxon Rank Sum test, p-value at 28 days of culture = 3.27e-05; p-values across CLS are listed in **Supplementary File 9**). Both the accumulation of the *met15Δ* segregants during the CLS, and the loss of the phenotype when *MET15* is not segregating, associated the lifespan extension with the methionine biosynthetic pathway and the organic sulphur cycle.

Methionine and other sulphur containing amino acids have repeatedly been linked to ageing, and typically it was a methionine restriction that caused a lifespan extension in model organisms<sup>55–60</sup>. Interestingly however, the high prevalence of *met15Δ* cells in SeMeCos and the high concentration of methionine produced by cells in the growth media did not suggest that an underlying methionine restriction would apply. To confirm that the fundamental mechanism of our observation is not methionine restriction, we conducted a control experiment, where we supplemented *met15Δ* cells with 2g/L of methionine. Despite the high methionine levels, we observed a robust lifespan extension in *met15Δ* cells (**Supplementary Fig. 6**, unpaired two-sided Wilcoxon Rank Sum test, p-value at 28 days of culture = 3.27e-05; p-values across CLS are listed in **Supplementary File 9**). In search of an alternative explanation, we found evidence for a paracrine effect. We performed an independent CLS experiment, comparing SeMeCos and ‘3p-SeMeCos’ unable to segregate the *MET15* locus, confirmed the dependency of the lifespan extension on the organic sulphur cycle pathway (**Supplementary Fig. 7**, unpaired one-sided Wilcoxon Rank Sum test, p-values in **Supplementary File 10**), and coupled the CFU analysis with metabotyping analysis (see Methods). Strikingly, we noted that the presence of the *met15Δ* cells significantly increased the maximum lifespan of the other cells in the community (**Fig. 3d-e**, unpaired one-sided Wilcoxon Rank Sum, p-values in **Supplementary File 11**).

***Lifespan extension in cooperating communities is mediated by an exometabolome rich in protective metabolites***

To explore the cell-extrinsic factors that mediate the lifespan extension phenotype, we started by dissecting the metabolic changes emerging when cells metabolically interact. First, we simulated the likely flux changes using a community-adapted version of the flux balance analysis (FBA) that allows monitoring the exchange of metabolites between cells <sup>38</sup>. We simulated the exchange of metabolites between a prototroph and each of the 15 auxotrophic metabolotypes that emerge from all possible combinations of H, L, U and M auxotrophies (**Supplementary Fig. 8a**). The community-FBA revealed that interactions between *MET15* and *met15Δ* cells cause broad metabolic flux changes affecting a range of metabolic pathways, including central metabolism. The broad response involves not only downstream effects of metabolism intracellularly but, in addition to methionine, also results in the exchange of a plethora of other metabolites. (**Supplementary Fig. 8b, Supplementary Fig. 9, Supplementary File 12**). This result opened the possibility that it is not only methionine exchange itself, but the metabolic changes introduced by the metabolic cooperation that cause the lifespan extension. In order to get a deeper understanding of the pathways involved, we continued with proteomics analysis. We extracted proteins from the communities, generated tryptic peptides, and analysed them using microLC-SWATH-MS <sup>61</sup> and processed the data with DIA-NN <sup>62</sup>. We then performed differential protein expression analysis comparing otherwise identical SeMeCos that differ in the segregation of the *MET15* marker (SeMeCos vs *MET15*-SeMeCos). We measured proteomes during exponential phase (day 1), early stationary (day 2) and stationary (day 8) growth phases (**Fig. 4a**). We consistently quantified 1951 proteins, around half the typically expressed yeast proteome <sup>63</sup>. The first principal component (PCA1) in a PCA analysis explained 33% of the variance and separated the proteomes according to growth

phase. The second principal component (PCA2), which accounts for a further 23% of the variance, separated the samples based on whether or not the communities segregated the *MET15* marker (SeMeCos vs *MET15*-SeMeCos and wild-type, respectively) (**Fig. 4b**, **Supplementary Fig. 10**). Moreover, a comparison of the different communities revealed that most of the differential protein expression occurs when *MET15* and *met15Δ* cells interact (**Fig. 4c**, **Supplementary Fig. 11**, unpaired two-sided *t*-test and multiple testing correction with BH method, adjusted p-values in **Supplementary File 13**). A Gene Set Enrichment Analysis (GSEA)<sup>64</sup> revealed that > 50% of the differentially expressed proteins (unpaired two-sided *t*-test, BH adjusted p-value < of 0.05) comprised gene ontologies (GO) belonging to metabolic processes (**Supplementary Fig. 12**, **Supplementary File 14**). Mapping of metabolic enzyme expression levels to the metabolic network allowed visualisation of the changes in metabolism that span over central metabolism and intermediate metabolism, in communities where *MET15* and *met15Δ* cells interact (**Fig. 4d**, **Supplementary Fig. 13**). Continuing with a pathway-centric analysis of the proteome did point our attention to glycolysis. Enzymes associated with the glycolysis pathway were generally upregulated in the communities that contained *MET15* segregants (**Fig. 4e**). Moreover, an increase in the expression of glycolytic metabolites in stationary cells that typically rely on oxidative phosphorylation for energy production<sup>44</sup> was somewhat a surprise (**Fig. 5a-b**). Indeed, both glycolytic activity and glycolytic overflow metabolites are associated with chronological ageing. While glucose restriction itself extends lifespan<sup>65</sup>, the glycolytic overflow metabolites ethanol and acetate both shorten lifespan<sup>52,66</sup>, but another glycolytic overflow metabolite, glycerol, increases CLS<sup>67</sup>. We speculated that a change in release of such metabolites might very well change the lifespan of cells that share a common metabolic environment. We therefore measured ethanol, acetate and glycerol in the exometabolome of the different SeMeCos and wild-type communities during CLS. In the stationary phase, levels of all three metabolites were higher in the communities where *MET15* and *met15Δ* segregants interacted. Most striking changes were observed for glycerol, whose levels were ~8 fold increased, whilst ethanol and acetate levels were ~2 fold higher (**Fig. 5b i**),

unpaired two-sided *t*-test, p-values in **Supplementary File 15**). In order to explain the sources of the increase in glycerol, we studied the intracellular metabolome. SeMeCos revealed concentration changes in upper and lower glycolytic metabolites across all growth phases: the most significant changes were however detected in the glycerol-associated three carbon phosphates (G3P, DHAP, and PEP) in the stationary phase. These were increased specifically in the communities where *MET15* and *met15Δ* cells interacted (**Fig. 5b ii**), unpaired two-sided *t*-test, p-values in **Supplementary File 15**). In parallel, we conducted oxygen consumption (OC) analysis. We found that the OC was reduced in the communities containing the *MET15* segregants (**Fig. 5c**, unpaired two-sided Wilcoxon Rank Sum test, p-values in **Supplementary File 16**). The three results were all consistent with the accumulation of glycerol in the extracellular medium: glycolytic enzymes and glycerol precursors were up, while respiratory metabolism, required for the use of a non-fermentable carbon source as glycerol, was reduced. To test whether an accumulation of glycerol could be associated with extending lifespan of cooperating communities, we performed a CLS assay where cells were grown in SM media supplemented with glycerol. Glycerol supplementation extended lifespan to 62 days of culture as compared to previously observed (Fig. 3c) <20 days in wild-type and *MET15*-SeMeCos. The SeMeCos also profited from the glycerol treatment, albeit the relative gain was lower than in wild type cells (mean fold change survival to wild-type in early stationary phase of 5.060%, 0.006% and 0.286% in SeMeCos, wild-type and *MET15*-SeMeCos, respectively, at 62 days of culture) (**Fig. 5d**, unpaired two-sided Wilcoxon Rank Sum test, p-values in **Supplementary File 17**).

While these results demonstrated that glycerol accumulation is beneficial, the glycerol increase alone might not sufficiently reflect the complexity of the yeast exometabolome. To validate if the community-created exometabolome is indeed mediating the lifespan extension, we hence complemented these results with a media swap experiment. We cultured wild-type communities in SM media until the early stationary phase (48h of culture) and then transferred them to a SeMeCo exometabolome (48h culture media generated in parallel). Control cultures were

generated by placing wild-type communities back in their own exometabolome (**Fig. 5e**). Wild-type communities cultured on the exometabolome harvested from SeMeCos showed significant lifespan extension, with mean percentage survival of 20 % in cultures chronologically aged in a SeMeCo exometabolome vs 2% in cultures chronologically aged in a control wild-type exometabolome, representing a 10-fold increase in CFU formation at 18 days of culture, (**Fig. 5e**, unpaired two-sided Wilcoxon Rank Sum test; p-value = 0.0286 at day 18 of culture, p-values across CLS in **Supplementary File 18**). Hence, the metabolic changes emerging when *MET15 met15Δ* cells interact generate a pro-survival metabolic environment that extends lifespan of all cells in a community.

## Discussion

The classical view of the metabolic network is the one of a biochemical network operating inside the cell. However, with increased understanding of single cell properties, microbial landscapes and phenotypic heterogeneity this view is rapidly evolving<sup>68</sup>. The individual cell is increasingly seen to be part of a metabolic environment spanning across cells, and thus, metabolite exchange interactions between cells are an essential part of metabolism<sup>32,69,70</sup>. In microbes, metabolic networks span not only over single, but also over multiple species that interact within microbial communities<sup>36,49,71–73</sup>. The degree of metabolite exchange within those communities appears to be extensive. For instance, a majority of microbes are uncultivable outside their community environments, with metabolic co-dependencies being one of the key reasons<sup>74</sup>. Another interesting observation is that from all 12,538 microbial communities sequenced as part of the Earth Microbiome project<sup>75</sup> only 6 contained no amino acid auxotrophs<sup>38</sup>. The interactions between amino auxotrophs and prototrophs is hence a common situation in microbial communities, which also shows that amino acids are effectively exchanged all the time.



404

405 In ecology, metabolite exchange interactions can lead to competition or cooperativity<sup>21,23</sup>, but in  
 406 any case, they have fundamental physiological implications. For instance, we have previously  
 407 shown that cells that uptake lysine from the environment mount better protection against  
 408 oxidants<sup>37</sup>, or that the presence of auxotrophs enriches metabolic environments and increases  
 409 drug tolerance<sup>38</sup>. Despite being fundamentally important in modulating cellular processes that  
 410 also impact on ageing - in particular to growth rate, metabolic signalling, and stress tolerance -  
 411 to our knowledge, the impact of metabolic intercellular interactions has barely been studied in  
 412 the context of cellular ageing and lifespan. Indeed, studying the physiological impact of  
 413 metabolite exchange interactions is technically challenging. Metabolite exchange interactions  
 414 between cells are not captured by many typical single-cell techniques, such as microscopic  
 415 imaging or single cells RNA sequencing, nor does the concentration of a metabolite explain  
 416 whether it was produced or consumed by the analysed cell. Moreover, the export and import of  
 417 metabolites can not be prevented without imposing major metabolic constraints. We herein  
 418 hence address this problem by using a combination of various omic, metabolic modelling and  
 419 genetic techniques, and use synthetic SeMeCo communities to boost metabolite exchange  
 420 interactions. It is important to stress here that SeMeCos do not rely on new or artificial  
 421 metabolite exchange interactions to yeast cells; they are based on the exchange of metabolite  
 422 intermediates, that are a result of the native biosynthetic capacity of yeast, which is boosted  
 423 through the progressive segregation of plasmids<sup>41,51</sup>. Certainly, as a tool of synthetic biology,  
 424 SeMeCo will not capture all features of natural metabolite exchange interactions. Indeed, with  
 425 the increasing amount of auxotrophies, SeMeCos become less metabolically versatile  
 426 compared to prototrophic wild-type cells. However, SeMeCos are one of the very few tools at  
 427 hand that allow tracing of metabolite exchange between cells, that can flexibly switch between  
 428 metabolite uptake and consumption. SeMeCos hence prove to be highly useful for studying the  
 429 physiological consequences of metabolite exchange interactions, by enabling us to boost and  
 430 trace them.



431

432 In studying metabolite exchange interactions in the context of chronological lifespan in yeast, we  
 433 made two observations that triggered our curiosity. The first was that metabolites exported  
 434 during the exponential phase, label the cells during the stationary phase, reflecting their import  
 435 by post-mitotic cells. In the batch-culture, there exists hence a ‘cross-generational’ exchange of  
 436 metabolites. Ecologically speaking, the batch culture might have been seen as an artificial  
 437 situation. However, in natural yeast colonies, old and young yeast cells co-exist in close  
 438 physical distance <sup>76</sup>. That means that metabolite exchange interactions are even more likely in a  
 439 natural colony than in batch culture. It is consistent with this notion, that a switch from liquid  
 440 culture to colony growth tripled the chronological lifespan of our cells. To us, this result hence  
 441 implies there could be extensive metabolic interactions that apply to both growth and ageing  
 442 phases of the yeast cell communities.

443 The second observation was that upon boosting metabolic interactions by using the SeMeCo  
 444 model, a significant extension of the CLS was achieved. Studying the metabotype composition  
 445 within SeMeCos attributed a special role to the methionine biosynthetic pathway that is part of  
 446 the organic sulphur cycle. We observed that cells that had segregated the *MET15* plasmid  
 447 comprised the highest proportion of long-lived cells in ageing communities. Sulphur amino acids  
 448 include methionine, cysteine, homocysteine and taurine <sup>77</sup> and have previously been associated  
 449 with lifespan extension. Methionine restriction in particular can extend lifespan in a number of  
 450 organisms <sup>55–60</sup>, prevent the development of a variety of diseases <sup>78</sup> and influence response to  
 451 anti-cancer therapies <sup>79,80</sup>. Our results differed, however, from many of these studies in a  
 452 fundamental aspect, as they did not indicate the lifespan extension is caused by methionine  
 453 restriction. We hence speculated that another mechanism could be at play in the communal  
 454 cells. The key observation which eventually led to a better understanding of the mechanism,  
 455 was that the presence of the *MET15* segregants did not only increase their own lifespan, but  
 456 also the lifespan of the other cells found within SeMeCos. This result strongly suggested that  
 457 only part of the answer is to be found in the intracellular metabolic reconfiguration in the *MET15*

segregants, and that we need to search for a paracrine effect, like a change in the extracellular metabolite pool, to understand the lifespan extension of the entire community.

In order to identify the metabolic changes, we combined metabolite profiling, proteomics and genome-scale metabolic modelling. We detected widespread metabolic changes in the communities containing *MET15* segregants, but were most intrigued by an upregulation of glycolytic enzymes, in a growth phase where typically oxidative metabolism dominates. In following this, we confirmed a decrease in oxygen consumption and an 8-fold increase in the glycolytic overflow metabolite glycerol. Glycerol is known as a protective and pro-survival metabolite <sup>67</sup>, and also in our hands, significantly extends the lifespan of both wild-type and SeMeCo communities. Glycerol stimulates several survival-associated processes, including osmoregulation, lipid biogenesis, cell wall integrity <sup>81</sup> and increase in autophagy <sup>67</sup>, a known regulator of lifespan <sup>82</sup>. It is likely that glycerol extends lifespan in a systematic way. Our data does not exclude the possibility that next to glycerol, other protective metabolites enrich in the communal environment, but it shows that in sum, the protective metabolites compensate for the release of acetate and ethanol, that typically result in short-living phenotypes <sup>52,66</sup>: the media collected from SeMeCo cells did extend the chronological lifespan of wild-type cells. Our results have interesting evolutionary implications. It has so far been debated if unicellular organisms would profit from a longer lifespan and if they have been selected for longevity <sup>83</sup>. Our study does not address this question directly, but it reveals an interesting new possibility, in the light that a vast majority of natural microbial communities contain auxotrophs <sup>38,74</sup>. Evolution could increase longevity by selecting for populations of cells that metabolically interact in a way that they generate a protective exometabolome. Specifically, the *MET15* segregants, which cannot synthesise methionine and require an organic sulphur source for growth <sup>84</sup>, cannot survive on their own in the absence of methionine producers. They would benefit if the lifespan of methionine producers is extended. Auxotrophy-prototrophy interactions might hence select for longevity in microbial communities, in other words that metabolic dependencies would not only drive species co-occurrence <sup>71</sup> but boost their longevity and evolution. In any case, our results

prompt future studies for closely examining the exometabolome as a cause of lifespan extension, specifically when metabolic interventions, such as metabolite restriction/supplementation or metabolic modulating drug treatments are applied.

In summary, we uncover a protective metabolic paracrine effect occurring in metabolically interacting eukaryotic microbial communities. Glycolytic methionine consumer cells enrich the intercellular space for the pro-survival metabolite glycerol, increasing the survival of their producer counterparts and overall community longevity. Impairment or inability to metabolically interact drives cellular dysfunction, which accompanies ageing and disease, therefore dissecting the metabolic dynamics and emerging metabolic environment when cells metabolically interact will aid the development of therapies targeting these processes. Often lifespan extension is associated with restriction conditions, but our data shows that a differentiated view is also necessary, as simple nutritional interventions like the exchange of amino acids can have broad changes in the metabolic network dynamics, reflected in the exometabolome, and alter lifespan this way. Future investigations are necessary to determine how broadly this situation impacts on other nutritional and/or metabolic contexts influencing lifespan.

## Methods

### Yeast cultivation and growth assays

### *Plasmids and strain construction*

The haploid BY4741 *S. cerevisiae* strain (*his3Δ1*, *leu2Δ0*, *ura3Δ0*, *met15Δ0*) was used to generate all subsequent strains used in the study. Prototrophy was restored either by genomic knock-in, with primer design based on information from Brachmann *et al.* 1998<sup>42</sup>, or plasmid complementation generated by Mülleder *et al.* 2016<sup>85</sup>, followed by standard cloning and yeast

transformation techniques<sup>86</sup>. Primers and plasmids details are in Tables S2 and S3, respectively.

### **SeMeCo generation and culture**

The generation and culture of SeMeCos was performed as previously described<sup>38</sup>. The pH, pL, pU and pM plasmid used to generate a SeMeCo strain in the BY4741 background are described in Table S3. All SeMeCo strains were cultured in minimal synthetic (SM) media, composed of yeast nitrogen broth without amino acids (YNB, 6.8 g/L; Sigma #Y0626) + 2% glucose (20 g/L; Sigma #G8270), so cells rely on the exchange of self-synthesised metabolites for growth and survival. Briefly, cryostocks were streaked onto SM + 2% agar medium and cultured at 30 °C for 3 days. Then, a micro-colony was diluted in 500 µl dH<sub>2</sub>O, and normalised to OD<sub>600nm</sub> = 0.8. Then, 5 µl were spotted onto solid SM medium to generate a giant colony. This initial spotting corresponded to ~7.2 x 10<sup>4</sup> cells using a predefined OD-to-cell number standard curve. Cells were incubated for 2 days at 30 °C, then giant colony generation was repeated, to ensure cells have undergone enough proliferation cycles and plasmid segregation, enabling metabolic cooperation, whilst being continuously kept in an exponential growth phase. Pre-cultures were generated by diluting the giant spots into 1 ml dH<sub>2</sub>O, normalised to OD<sub>600nm</sub> = 1 in SM liquid medium and cultured for 16 hours at 30 °C. Cultures were then generated by diluting the pre-cultures to OD<sub>600nm</sub> = 0.1 in SM liquid medium and cultured for the duration of the CLS. This relatively high starting OD<sub>600nm</sub> ensures cells are kept at a density that minimises disturbing the relative proportions of auxotrophs and prototrophs generated in SeMeCos. Cells were collected for downstream experiments at different growth phases, as indicated in figure legends. The control wild-type (BY4741, quadruple knock-in - *HIS3*, *LEU2*, *URA3* and *MET15*) strain followed the exact same procedures as SeMeCos. Strain details are in Table S1.

For CLS assays where cells were grown on glycerol, SM was supplemented with 3% Glycerol (Sigma # G2025) and 1% Glucose; SeMeCo generation and respective wild-type controls were

grown on solid SM supplemented with glucose prior to being cultured in SM supplemented with glycerol from pre-culture stage onwards.

### ***Knockout strains culture***

Knockout strains cultures followed the exact same procedure as described for SeMeCo generation and culture. In the case of metabolic knockout mutants (*met15Δ*), cells were grown on SM media supplemented with the metabolite for which the strain was biosynthetically impaired (2g/L L-methionine), with respective wild-type controls also being cultured in SM supplemented with the metabolite. Strain details are in Table S1.

### ***Isotope tracing***

Wild-type yeast cells were cultured in SM media supplemented either with <sup>12</sup>C-glucose (<sup>12</sup>C-glu; Sigma #G8270) or <sup>13</sup>C-glucose (<sup>13</sup>C-glu; Sigma #389374), during 48 hours, then media was swapped for tracing amino acid export/import, using targeted metabolomics <sup>50</sup> (HPLC-MS/MS), at different time points post media swap. Control cultures were swapped from SM supplemented with <sup>13</sup>C-glucose to SM solely supplemented with <sup>12</sup>C-amino acids (<sup>12</sup>C-AA; Sigma #Y1896) at standard culturing concentrations.

### ***Exometabolome exchange***

Wild-type and SeMeCo yeast cells were cultured in parallel, in SM media, for 48 hours (until the stationary phase). Culture media was then collected by spinning down cells in each culture at 3000g for 5 min at room temperature (RT) followed by supernatant (media) filtering with a 0.22 µm syringe filter. Some wild-type culture cell pellets were then gently resuspended in the filtered media (exometabolome) from SeMeCos whilst others were resuspended back in their own filtered media as control. Wild-type cultures in SeMeCos or wild-type exometabolomes were then followed for CLS.

## **Growth assays**

Growth was assessed by monitoring biomass formation using optical density absorbance at a wavelength of 600 nm (OD<sub>600</sub>). OD<sub>600</sub> was recorded either manually during the CLS, on a Ultrasepc 2100 pro manual<sup>TM</sup> (Amersham Biosciences), or automatically on a plate reader NanoQuant Plate<sup>TM</sup>, Infinitive 200 PRO (Tecan), every 10 minutes, until cells reached stationary phase, at 30 °C for growth curve recording. Both maximum growth and time to mid log phase were determined from growth curves using the R ‘grothcurver’ package<sup>87</sup>.

## **Chronologic Lifespan**

### **Conventional and High-throughput Colony Forming Unit (CFU) assays**

Conventional CFU analysis was performed as described previously<sup>88</sup> by aliquoting ageing cultures throughout CLS, and plating cells at different dilution factors into solid rich media (YPD), composed of yeast extract (10 g/L; Sigma), peptone (20 g/L; Sigma), dextrose (20 g/L; Sigma) and agar (20 g/L; Sigma). Cells were incubated for 2 days at 30 °C and the number of CFUs were recorded. Increasing numbers of cultures analysed in parallel required the usage of a high-throughput CFU (HTP-CFU) method as described in<sup>89</sup>. Briefly, 200 µL aliquots of ageing culture were loaded into the first column of a 96-well plate (8 cultures in parallel per plate). The rest of the plate was loaded with 100 µL of dH<sub>2</sub>O. Using a Biomek NX<sup>P</sup> automatic liquid handler (Beckman Coulter), 50 µL of the ageing culture from the first column were serially diluted 3-fold across the plate, ensuring each dilution factor was well mixed. Droplets of serially diluted ageing cultures were immediately dispensed onto solid YPD, in quadruplicate (384-well format) using a Singer RoToR HDA pinning robot (Singer Instruments). For this, long-pin 96-density pads were used, making sure that the source plate was revisited before each pin onto the agar. Plates were incubated for 2 days at 30 °C until patterns of colonies appeared. Images of agar plates were acquired with Pyphe-scan<sup>90</sup> using an Epson V700 scanner in transmission mode. Plate image analysis and quantification of the number of CFUs in the ageing culture, based on the

colony patterns observed, were performed using the R package, DeadOrAlive<sup>89</sup>. In both conventional- and HTP-CFU assays, survival of the different strains was normalised, first to biomass at time of sample collection, as measured by OD<sub>600</sub>, and then to the survival of the respective wild-type controls at the beginning of the stationary phase (48 hours from the start of culture).

### ***Live/Dead Staining***

Cell death was assessed using the LIVE/DEAD™ Fixable Far Red Dead Cell Stain Kit, for 633 or 635 nm excitation (ThermoFisher Scientific, Cat no. L10120) according to the manufacturer's instructions, followed by high-throughput flow cytometry (HTP-FC). Briefly, an aliquot of 300 uL of each ageing culture was transferred to a 96-deep well plate. Plates were then spun down at 3000 g for 3 min RT, supernatant was discarded and cells were resuspended in 300 uL of diluted dye (1:1000 diluted stock dye in dH<sub>2</sub>O), followed by an incubation of 30 minutes in the dark. Cells were then washed in 500 uL of dH<sub>2</sub>O, resuspended in 300 uL of ~4% formaldehyde (dilute 1:10 37% Formaldehyde in PBS 1x) and incubated 10 min in the dark. Cells were washed in PBS 1x and stored in 500 uL fresh PBS 1x at 4°C, protected from light, until analysis by HTP-FC. Immediately prior to analysis, samples were sonicated for 20 s at 50W (JSP Ultrasonic Cleaner model US21), and 250 uL were transferred to a 96-well plate for HPT-FC analysis. For HTP-FC, 30,000 cells/sample were measured in a Fortessa X20 Flow cytometer (BD Biosciences), using the HTS plate mode on the DIVA software and a 633 nm excitation laser to capture the dye staining. Populations of interest were gated using the FlowJo software version 10.3.0. Features of interest (dead and live cell populations) were then exported for further analysis using R studio.

### ***Metabotyping***

Metabotype performed as previously described<sup>51</sup>, with the difference that colonies were cryostocked prior to replica-plating, so cells collected at different time points across the CLS



would be analysed in parallel. Firstly, conventional CFUs were performed as described above. Then 96 individual CFUs per biological replicate were resuspended in 100 µl of liquid YPD supplemented with 30% glycerol in a 96 well plate (Nunc™ Sigma), as one colony/well, and then incubated at 30 °C ON prior freezing at -80 °C. Once all samples across the CLS were collected, plates were defrosted and then replica plated on six plates, containing either (a) complete medium (SM with all four missing nutrients - 2g/L of L-histidine, L-uracil and L-methionine and 6g/L of L-leucine, Sigma), (b) SM medium, and plates with SM and all nutritional supplements except (c) L-histidine, (d) L-leucine, (e) L-uracil, or (f) L-methionine. The absence of growth in a particular drop-out medium reflects the clone auxotrophy for that specific metabolite. The combinatorial growth ability in the six different media allows determination of each clone metabotype (total auxotrophies it contains). This method permits identification of all 16 possible metabotypes resulting from all possible combinations of the four auxotrophies.

## **pH analysis**

Aliquots of 1 mL were collected per culture at different time points during the CLS and pH was measured using a Mettler-Toledo InLab® Micro & Micro Pro pH electrode coupled to pH/Ion bench meter SC S220-B (Mettler Toledo).

## **Oxygen consumption measurements**

Ten mL of CLS cultures were collected during exponential (day 1) and early stationary phase (day 2) and placed into a 10-mL Erlenmeyer flask and stirred at 900 rpm using a magnetic stirrer bar. An oxygen probe (Hanna HI 98193), held with a clamp, was inserted into the flask, resulting in it being completely filled with no remaining air inside it, and the flask was sealed with multiple layers of parafilm. The oxygen saturation of the culture was recorded every ~1 min for 5 min. Oxygen levels were normalised to biomass, as measured by OD<sub>600</sub>, and to levels of wild-type at the end of measurements (5 min).



646

647

648

## 649 **Metabolomics**

650

### 651 **Targeted metabolomics for intracellular glycolytic and TCA intermediates, nucleotides** 652 **and amino acids**

#### 653 ***Sample preparation***

654 Ageing cultures, at several time points reflecting different growth phases, were sampled and  
655 400  $\mu$ L of each culture were quenched in 1600  $\mu$ L dry-ice-cold methanol, into a 48-deep-well  
656 plate. This suspension was spun down (600 g, 3 min, 4°C), and the supernatant was discarded  
657 by inversion, followed by a short spin (600 g, 1 min, 4°C) to ensure complete removal of the SN.  
658 Cell pellets were immediately placed on dry ice and then transferred to -80 °C until analysis.  
659 Intracellular metabolites were then extracted as described<sup>91</sup>. Briefly, 140  $\mu$ L of 10:4 MeOH/water  
660 were added and vortexed. Then, 50  $\mu$ L chloroform was added, followed by 50  $\mu$ L water and 50  $\mu$ L  
661 chloroform with thorough mixing in between. Phases were separated by centrifugation at 3,000  
662 g for 10 min. The aqueous phase was recovered and used without further conditioning. One  
663 microlitre was injected for HPLC-MS/MS analysis. Before analysis by HPLC-MS/MS the order of  
664 samples was randomised and during analysis a quality control sample (QC) was assessed  
665 every 24 samples.

#### 666 ***Sample acquisition***

667 Metabolites were resolved on an Agilent 1290 liquid chromatography system by HILIC coupled  
668 to an Agilent 6470 triple quadrupole instrument operating in dynamic MRM mode, as previously  
669 described<sup>43</sup>. In short, the gradient program started at 30% B (100 mM ammonium carbonate)  
670 and was kept constant for 3 min before a steady increase to 60% B over 4 min. Solvent B was  
671 maintained at 60% for 1 min before returning to initial conditions. The column was washed and

equilibrated for 2 min resulting in a total analysis time of 10 min. We used acetonitrile as solvent A and a Waters BEH Amide column (2.1 × 100 mm, 1.7 µm particle size) for separation. The flow rate was set to 0.3 ml/min and column temperature to 35°C. Compounds were identified by comparing retention time and fragmentation patterns with analytical standards. Metabolite quantifications were then normalised per biomass, as measured by OD<sub>600</sub>, at the time of collection.

## **Targeted metabolomics for intracellular and extracellular amino acids & uracil quantification**

### ***Sample preparation***

Ageing cultures, at several time points reflecting different growth phases, were sampled and 500 µL of each culture were collected into a 96-deep-well plate for amino acid & uracil profiling. Samples were centrifuged at 4,000 g for 3 min and supernatants (SN) were transferred into a new 96-deep-well plate for extracellular metabolite profiling, whilst cell pellets were washed once in dH<sub>2</sub>O, spun down at 4,000 g for 3 min and SN was discarded (followed by a 1 min spin for complete removal of SN) for later intracellular metabolite profiling. Both cell pellets and SN were immediately frozen in dry ice and samples were then stored at -80 °C until analysis.

The amino acid extraction and uracil extraction, separation and detection protocols were adapted from <sup>50</sup>. Briefly, 200 µl of 80% ethanol at 80 °C were added to the yeast pellets. Samples were heated for 2 min at 80 °C, vigorously mixed on a vortex mixer and incubated for further 2 min at 80 °C followed by vigorous vortexing. The extracts were removed from debris by centrifugation at 12,000 g for 5 min. SN were also centrifuged at 12,000 g for 5 min to further purify samples from any debris. Before analysis by HPLC-MS/MS the order of samples was randomised and during analysis a quality control sample (QC) was assessed every 24 samples.

## **Sample acquisition**

Analysis by LC-MS/MS, amino acids & uracil were separated by hydrophilic interaction liquid chromatography (HILIC) using an ACQUITY UPLC BEH amide column (130A° , 1.7 mm, 2.1 mm X 100 mm) on a liquid chromatography (Agilent 1290 Infinity) and tandem mass spectrometry (Agilent 6460) system. Buffer A was composed of 50:50 acetonitrile/water (Greyhound Bio-012041, Greyhound 23214125), 10 mM ammonium formate (Fluka, Cat. No. 14266), 0.176% formic acid (Fluka, Cat. No. O6454) and buffer B of 95:5:5 acetonitrile/methanol/water (Greyhound BIO-13684102), 10 mM ammonium formate, 0.176% formic acid. The gradient elution was performed at a constant flow rate of 0.9 ml/min. Starting conditions were 85% buffer B, after 0.7 min the concentration of buffer B was decreased gradually to 5% until 2.55 min and kept for a further 0.05 min before returning to initial conditions. The column was then equilibrated, resulting in a total runtime of 3.25 min. Compounds were identified by matching retention time and fragmentation (MS2) with commercially obtained standards (Sigma-Aldrich, Cat. No. LAA21). Signals for free amino acids were then acquired in dynamic SRM mode in the MassHunter Software Agilent. Amino acid & uracil quantifications were then normalised per biomass, as measured by OD<sub>600</sub>, at the time of collection.

Extracellular amino acids and uracil data from wild-type in exponential phase are a re-analysis of data in <sup>38</sup>; experiments, including cell culture, metabolite extraction and sample acquisition, were performed in parallel.

## **HPLC method for ethanol, acetate and glycerol exometabolome quantification**

### **Sample preparation**

Frozen SN in 96 deep-well plates (collected as described above for amino acid and uracil analysis) were defrosted and kept shaking using plate shaker for 20 minutes 900 rpm room temperature, just before the filtration, using a multiscreen filtered plate with 0.45 um durapore

membrane (MVHVN4525) and Strata well plate manifold  
(<https://phenomenex.blob.core.windows.net/documents/863d86a0-3aba-4591-979b-bf54b1188038.pdf>) and a Welch vacuum pump.

### **Sample acquisition**

The target compounds were quantified using a Shimadzu Prominence HPLC (<https://www.ssi.shimadzu.com/products/liquid-chromatography/prominence-hplc.html>) equipped with a refractive index detector RID20A and a Sil20-ACT auto sampler with a 96 well plate injector tray. The separation was performed on an Agilent Hi-plex H column (<https://www.agilent.com/cs/library/applications/5990-8801EN%20Hi-Plex%20Compendium.pdf>). The temperature of the column and detector was 50 and 41 °C, respectively. The eluent was 0.00125 N H<sub>2</sub>SO<sub>4</sub> in Type 1 water (0.6 mL min<sup>-1</sup>). The samples were kept in 96 well plates (<https://www.sarstedt.com/en/products/laboratory/cell-tissue-culture/cultivation/product/83.3926/>) covered with silicone mat (<https://www.phenomenex.com/Products/Part/AH0-8633>) at 4 °C in the autosampler prior the injection for no longer than 2 days. 5 uL was injected from the samples / well plates as well as standard compounds. The method works with 26 minutes cycle time. To keep the retention times and detector response constant 5 L of eluent was mixed in one batch.

For the data analysis the Shimadzu data processing software was used. Target compounds were identified by using automatic retention time matching with individual standards of in the house overflow metabolite library dissolved in SD minimal media. Compound concentrations were calculated using peak area integration with pre-optimized integration parameters and external calibration for each compound. All the calibration curves showed high linearity R<sup>2</sup> > 0.9999 at 3 orders of magnitude concentration range. The integration and compound identification were manually overviewed. Data was then exported and further processed using R. Metabolite quantifications were then normalised per biomass, as assessed by OD<sub>600</sub>, at the time of collection.

752

## 753 **Proteomics**

### 754 ***Sample preparation***

755 Ageing cultures, at several time points reflecting different growth phases, were sampled and  
 756 500 uL of each culture were collected into a 96-deep-well plate. Samples were centrifuged at  
 757 4,000 g for 3 min and supernatants (SN) were discarded. Samples were centrifuged again at  
 758 4,000 g for 1 min to fully remove any residual SN. Cell pellets were immediately placed on dry  
 759 ice before being stored at -80°C, until all samples were collected. Sample preparation for  
 760 proteomics was performed as previously described <sup>61</sup>. Briefly, cell pellets were processed in a  
 761 bead beater for 5 min at 1,500 r.p.m. (Spex Geno/Grinder), in a lysis buffer where proteins were  
 762 denatured in 8 M urea (Sigma-Aldrich, 33247) plus 0.1 M ammonium bicarbonate (Sigma-  
 763 Aldrich, 09830) at pH 8.0. Samples were spun down for 1 min at 4000 r.p.m, before they were  
 764 reduced in 5 mM dithiothreitol (Sigma-Aldrich, 43815) for 1h at 30 °C and then alkylated in 10  
 765 mM iodoacetamide (Sigma-Aldrich, I1149) for 30 min at RT protected from light. Samples were  
 766 diluted to less than 1.5 M urea in 0.1 M ammonium bicarbonate at pH 8.0, before proteins were  
 767 digested overnight at 37 °C with trypsin (Promega, V511X). Trypsin was neutralised with 1%  
 768 formic acid (FA) (Fisher Scientific, 13454279), before peptides were cleaned-up in 96-well  
 769 MacroSpin plates (Nest Group): 1. plates were first equilibrated in a series of Methanol (1x)  
 770 (Greyhound Chromatography, BIO-13684102), 50% ACN (2x) (Greyhound Chromatography,  
 771 Bio-012041-2.5L), and 3% ACN 0.1% FA (2x), between each wash plates were spun down for 1  
 772 min at 100 g and flow through was discarded; 2. samples were loaded into the plates and  
 773 peptides were cleaned-up in a series of 3% ACN, 0.1% FA (3x), between each wash samples  
 774 were spun down for 1 min at 100 x g and flow through was discarded; 3. peptides were eluted  
 775 into a new collection plate with 50% ACN (3x) and spun dried overnight at RT in speed vacuum.  
 776 Peptides were then dissolved in 40 uL of 3% ACN 0.1% FA. Peptide concentration was  
 777 measured at Absorbance 280 nm using the Lunatic (Unchained Labs).

778

## **Sample acquisition**

The digested peptides were analysed on a nanoAcquity (Waters) (running as 5  $\mu\text{l min}^{-1}$  microflow liquid chromatography) coupled to a TripleTOF 6600 (SCIEX). Protein digest (2  $\mu\text{g}$ ) was injected and the peptides were separated with a 23 min non-linear gradient starting with 4% acetonitrile in 0.1 % formic acid and increasing to 36% acetonitrile in 0.1% formic acid. A Waters HSS T3 column (150 mm  $\times$  300  $\mu\text{m}$ , 1.8  $\mu\text{m}$  particles) was used. The DIA method consisted of an MS1 scan from m/z 400 to m/z 1250 (50 ms accumulation time) and 40 MS2 scans (35 ms accumulation time) with a variable precursor isolation width covering the mass range from m/z 400 to m/z 1250. Data quantification was performed using DIA-NN version 1.7.1 software <sup>62</sup>. Post-processing data analysis was conducted in R <sup>92</sup>.

## **Genome-scale metabolic modelling (Flux balance analysis)**

### ***Constructing auxotroph-prototroph community metabolic models***

The community metabolic models were reconstructed using the approach from our previous study <sup>38</sup>. Briefly, the genome-scale metabolic model of *S. cerevisiae* <sup>93,94</sup> was used to create auxotrophic strain models by switching off respective metabolic reactions. Then the reactions from auxotroph (H, L, U and/or M) and prototroph (WT) models were combined to make the community, using the compartment per guild approach, where both strains were treated as separate compartments and metabolic exchange between strains were allowed. The community biomass was the combined biomass of all strains. The Cobra toolbox <sup>95</sup> was used to perform the model simulations.

## **Data analysis and statistics**

All statistical analyses were done in R (R Core Team, 2015) <sup>92</sup> using specific packages as indicated throughout the methods section. For the basic data manipulation and visualisation we used the R tidyverse package compilation and for statistical analysis we used the R ggpubr package. Hypothesis testing to assess means of population differences were mainly done using

*t*-test whenever the variables could be assumed continuous, or otherwise using Wilcoxon Rank Sum test, as indicated in the respective figure legends. Sample size estimations were not performed in any of the experiments. All experiments were performed using at least  $n=3$  biological replicates. Post-processing data analysis was conducted in R. Missing values in the proteomics data were median imputed. Differential protein expression analysis was performed using the limma package v3.48.3 in R <sup>96</sup>. Gene Ontology (GO) terms were retrieved using GO2ALLORFS object of org.Sc.sgd.db v3.14.0 package <sup>97</sup> and enrichment analysis of differentially expressed proteins was performed using hypergeometric statistical tests. GO slim term mapper from SGD database <sup>98</sup> was used to map differentially expressed proteins with GO slim terms. KEGG term mapper from KEGG database <sup>99</sup> used to map differentially expressed proteins with KEGG terms. Metabolic enzyme expression levels were mapped to the yeast metabolic network using iPATH3 <sup>100</sup>.

## **Data availability**

The data supporting the findings of this study are available within the paper, its Supplementary Information and will be deposited within publicly accessible repositories (before formal acceptance). The proteomic datasets generated during the current study that are relevant to data shown in Fig. 4 and Supplementary Fig 10-13 will be available from the PRoteomics IDentifications database (PRIDE, <https://www.ebi.ac.uk/pride/>) as part of the global Proteomexchange (PX) consortium <sup>101</sup>. Yeast gene functions and GO slim term mapper can be accessed at the Saccharomyces Genome Database (SGD, <https://www.yeastgenome.org/>). Protein sequence databases used for the identification and mapping of proteins from proteomics can be accessed via Uniprot (<https://www.uniprot.org/>) and KEGG (<https://www.genome.jp/kegg/pathway.html>), respectively.

## Code availability

No custom codes were generated as part of this study. All analyses conducted in R v3.6.1 used standard, publicly accessible packages obtained either through GitHub (<https://github.com/>), the Comprehensive R Archive Network (CRAN, <https://cran.r-project.org/>) or via Bioconductor (<https://www.bioconductor.org/>).

## Acknowledgements

We thank our lab member Dr. Benjamin Heineke (The Francis Crick Institute, London, UK) for inspiring discussions. This work was supported by the Francis Crick Institute, which receives its core funding from Cancer Research UK (FC001134), the UK Medical Research Council (FC001134) and the Wellcome Trust (FC001134, IA 200829/Z/16/Z). This research was funded in part by the Wellcome Trust (FC001134 and IA 200829/Z/16/Z to M.R., supporting C.C-M., S.K., M.M. C.B.M., L.H-D., V.D., S.J.T., A.F., K.C., S.A., L.S. and J.S.L.Y). For the purpose of Open Access, the author has applied a CC BY public copyright licence to any Author Accepted Manuscript version arising from this submission. The work was further supported by the Ministry of Education and Research (BMBF), as part of the National Research Node ‘Mass spectrometry in Systems Medicine (MSCoreSys)’, under grant agreements 031L0220 (to M.R.) and 161L0221 (to V.D.), and the European Commission (EC) as part of CoBioTech project Sycolim ID#33. M.T.A. is funded by the United Arab Emirates University, Al Ain (UAE). The work performed by R.T. is supported by the National Research, Development and Innovation Office PD 128271 and B.P. is supported by the National Research, Development and Innovation Office Élvonal Program KKP 129814, Lendület” program of the Hungarian Academy of Sciences LP2009-013/2012 and the European Union’s Horizon 2020 research and innovation program Grant No. 739593. AZ was supported by the SciLifeLab funding and Marius Jason Jakulis (MJJ) foundation.



## Author contributions

Conceptualization was carried out by C.C-M. and M.R. Methodology was the responsibility of C.C-M., S.K., M.M., C.B.M, SJ.T and L.S. Experimental investigation and experimental design was performed by C.C-M., S.K., M.M., L.H-D., C.B.M. R.T., A.F., K.C., B.P., S.A., L.S and J.S.L.Y) Formal analysis was conducted by C.C-M., V.D., A.Z., SJ.T., and M.T.A. C.C-M and M.R. wrote the article.

## Conflict of interest

K.C. is currently employed by AstraZeneca. The authors declare no competing interests.

## List of Supplementary Information

- Supplementary Figures: 1-13
- Supplementary Tables:1- 3
- Supplementary Files: 1-18 (provided as .xlxs or.csv)

# References

1. Zhu, J. & Thompson, C. B. Metabolic regulation of cell growth and proliferation. *Nat. Rev. Mol. Cell Biol.* **20**, 436–450 (2019).
2. López-Otín, C., Galluzzi, L., Freije, J. M. P., Madeo, F. & Kroemer, G. Metabolic Control of Longevity. *Cell* **166**, 802–821 (2016).
3. Metallo, C. M. & Vander Heiden, M. G. Understanding metabolic regulation and its influence on cell physiology. *Mol. Cell* **49**, 388–398 (2013).
4. Martínez, J. L. & Rojo, F. Metabolic regulation of antibiotic resistance. *FEMS Microbiol. Rev.* **35**, 768–789 (2011).
5. Ring, J. *et al.* The metabolism beyond programmed cell death in yeast. *Exp. Cell Res.* **318**, 1193–1200 (2012).
6. Moretton, A. & Loizou, J. I. Interplay between Cellular Metabolism and the DNA Damage Response in Cancer. *Cancers* **12**, (2020).
7. Fontana, L. & Partridge, L. Promoting health and longevity through diet: from model organisms to humans. *Cell* **161**, 106–118 (2015).
8. Powers, R. W., 3rd, Kaeberlein, M., Caldwell, S. D., Kennedy, B. K. & Fields, S. Extension of chronological life span in yeast by decreased TOR pathway signaling. *Genes Dev.* **20**, 174–184 (2006).
9. Lu, J.-Y. *et al.* Acetylation of yeast AMPK controls intrinsic aging independently of caloric restriction. *Cell* **146**, 969–979 (2011).
10. Kennedy, B. K., Austriaco, N. R., Jr, Zhang, J. & Guarente, L. Mutation in the silencing gene SIR4 can delay aging in *S. cerevisiae*. *Cell* **80**, 485–496 (1995).
11. Howitz, K. T. *et al.* Small molecule activators of sirtuins extend *Saccharomyces cerevisiae* lifespan. *Nature* **425**, 191–196 (2003).
12. Bradshaw, P. C. Cytoplasmic and Mitochondrial NADPH-Coupled Redox Systems in the Regulation of Aging. *Nutrients* **11**, (2019).
13. Sies, H. & Jones, D. P. Reactive oxygen species (ROS) as pleiotropic physiological

- signalling agents. *Nat. Rev. Mol. Cell Biol.* **21**, 363–383 (2020).
14. Piedrafita, G., Keller, M. A. & Ralser, M. The impact of non-enzymatic reactions and enzyme promiscuity on cellular metabolism during (oxidative) stress conditions. *Biomolecules* **5**, 2101–2122 (2015).
15. Correia-Melo, C., Hewitt, G. & Passos, J. F. Telomeres, oxidative stress and inflammatory factors: partners in cellular senescence? *Longev Healthspan* **3**, 1 (2014).
16. Tan, B. L., Norhaizan, M. E., Liew, W.-P.-P. & Sulaiman Rahman, H. Antioxidant and Oxidative Stress: A Mutual Interplay in Age-Related Diseases. *Front. Pharmacol.* **9**, 1162 (2018).
17. Balaban, R. S., Nemoto, S. & Finkel, T. Mitochondria, oxidants, and aging. *Cell* **120**, 483–495 (2005).
18. Jang, C. *et al.* Metabolite Exchange between Mammalian Organs Quantified in Pigs. *Cell Metab.* **30**, 594–606.e3 (2019).
19. Richter, F. C., Obba, S. & Simon, A. K. Local exchange of metabolites shapes immunity. *Immunology* **155**, 309–319 (2018).
20. Douglas, A. E. The microbial exometabolome: ecological resource and architect of microbial communities. *Philos. Trans. R. Soc. Lond. B Biol. Sci.* **375**, 20190250 (2020).
21. D'Souza, G. *et al.* Ecology and evolution of metabolic cross-feeding interactions in bacteria. *Nat. Prod. Rep.* **35**, 455–488 (2018).
22. Soeters, P. B. *et al.* The anabolic role of the Warburg, Cori-cycle and Crabtree effects in health and disease. *Clin. Nutr.* **40**, 2988–2998 (2021).
23. Smith, P. & Schuster, M. Public goods and cheating in microbes. *Curr. Biol.* **29**, R442–R447 (2019).
24. Frank, S. A. Microbial metabolism: optimal control of uptake versus synthesis. *PeerJ* **2**, e267 (2014).
25. Paczia, N. *et al.* Extensive exometabolome analysis reveals extended overflow metabolism in various microorganisms. *Microb. Cell Fact.* **11**, 122 (2012).

26. Vazquez, A. & Oltvai, Z. N. Macromolecular crowding explains overflow metabolism in cells.  
*Sci. Rep.* **6**, 31007 (2016).
27. Pinu, F. R. *et al.* Metabolite secretion in microorganisms: the theory of metabolic overflow  
put to the test. *Metabolomics* **14**, 43 (2018).
28. Alam, M. T. *et al.* The self-inhibitory nature of metabolic networks and its alleviation through  
compartmentalization. *Nat. Commun.* **8**, 16018 (2017).
29. Kaleta, C., Schäuble, S., Rinas, U. & Schuster, S. Metabolic costs of amino acid and  
protein production in Escherichia coli. *Biotechnol. J.* **8**, 1105–1114 (2013).
30. D'Souza, G. *et al.* Less is more: selective advantages can explain the prevalent loss of  
biosynthetic genes in bacteria. *Evolution* **68**, 2559–2570 (2014).
31. Wang, Y.-P. & Lei, Q.-Y. Metabolite sensing and signaling in cell metabolism. *Signal  
Transduct Target Ther* **3**, 30 (2018).
32. Campbell, K., Herrera-Dominguez, L., Correia-Melo, C., Zelezniak, A. & Ralser, M.  
Biochemical principles enabling metabolic cooperativity and phenotypic heterogeneity at  
the single cell level. *Current Opinion in Systems Biology* **8**, 97–108 (2018).
33. Conrad, M. *et al.* Nutrient sensing and signaling in the yeast *Saccharomyces cerevisiae*.  
*FEMS Microbiol. Rev.* **38**, 254–299 (2014).
34. Goyal, S., Yuan, J., Chen, T., Rabinowitz, J. D. & Wingreen, N. S. Achieving optimal growth  
through product feedback inhibition in metabolism. *PLoS Comput. Biol.* **6**, e1000802  
(2010).
35. Evans, C. R., Kempes, C. P., Price-Whelan, A. & Dietrich, L. E. P. Metabolic Heterogeneity  
and Cross-Feeding in Bacterial Multicellular Systems. *Trends Microbiol.* **28**, 732–743  
(2020).
36. Campbell, K., Vowinckel, J. & Ralser, M. Cell-to-cell heterogeneity emerges as  
consequence of metabolic cooperation in a synthetic yeast community. *Biotechnol. J.* **11**,  
1169–1178 (2016).
37. Olin-Sandoval, V. *et al.* Lysine harvesting is an antioxidant strategy and triggers

- underground polyamine metabolism. *Nature* **572**, 249–253 (2019).
38. Yu, J. *et al.* Microbial communities form rich extracellular metabolomes that foster metabolic interactions and promote drug tolerance. *Nature Microbiology* (2022, *in press*) doi:10.1038/s41564-022-01072-5.
39. MacLean, M., Harris, N. & Piper, P. W. Chronological lifespan of stationary phase yeast cells; a model for investigating the factors that might influence the ageing of postmitotic tissues in higher organisms. *Yeast* **18**, 499–509 (2001).
40. Laun, P., Rinnerthaler, M., Bogengruber, E., Heeren, G. & Breitenbach, M. Yeast as a model for chronological and reproductive aging - a comparison. *Exp. Gerontol.* **41**, 1208–1212 (2006).
41. Campbell, K. *et al.* Self-establishing communities enable cooperative metabolite exchange in a eukaryote. *Elife* **4**, (2015).
42. Brachmann, C. B. *et al.* Designer deletion strains derived from *Saccharomyces cerevisiae* S288C: a useful set of strains and plasmids for PCR-mediated gene disruption and other applications. *Yeast* **14**, 115–132 (1998).
43. Kamrad, S. *et al.* Pyruvate kinase variant of fission yeast tunes carbon metabolism, cell regulation, growth and stress resistance. *Mol. Syst. Biol.* **16**, e9270 (2020).
44. Galdieri, L., Mehrotra, S., Yu, S. & Vancura, A. Transcriptional regulation in yeast during diauxic shift and stationary phase. *OMICS* **14**, 629–638 (2010).
45. Slavov, N. & Botstein, D. Coupling among growth rate response, metabolic cycle, and cell division cycle in yeast. *Mol. Biol. Cell* **22**, 1997–2009 (2011).
46. Zampar, G. G. *et al.* Temporal system-level organization of the switch from glycolytic to gluconeogenic operation in yeast. *Mol. Syst. Biol.* **9**, 651 (2013).
47. Bianchi, F., van't Klooster, J. S., Ruiz, S. J. & Poolman, B. Regulation of Amino Acid Transport in *Saccharomyces cerevisiae*. *Microbiol. Mol. Biol. Rev.* **83**, (2019).
48. Kumar, K., Venkatraman, V. & Bruheim, P. Adaptation of central metabolite pools to variations in growth rate and cultivation conditions in *Saccharomyces cerevisiae*. *Microb.*

*Cell Fact.* **20**, 64 (2021).

49. Ponomarova, O. *et al.* Yeast Creates a Niche for Symbiotic Lactic Acid Bacteria through Nitrogen Overflow. *Cell Syst* **5**, 345–357.e6 (2017).

50. Mülleder, M., Bluemlein, K. & Ralser, M. A High-Throughput Method for the Quantitative Determination of Free Amino Acids in *Saccharomyces cerevisiae* by Hydrophilic Interaction Chromatography-Tandem Mass Spectrometry. *Cold Spring Harb. Protoc.* **2017**, db.prot089094 (2017).

51. Campbell, K., Correia-Melo, C. & Ralser, M. Self-Establishing Communities: A Yeast Model to Study the Physiological Impact of Metabolic Cooperation in Eukaryotic Cells. *Methods Mol. Biol.* **2049**, 263–282 (2019).

52. Burtner, C. R., Murakami, C. J., Kennedy, B. K. & Kaeberlein, M. A molecular mechanism of chronological aging in yeast. *Cell Cycle* **8**, 1256–1270 (2009).

53. Piper, M. D. W., Partridge, L., Raubenheimer, D. & Simpson, S. J. Dietary restriction and aging: a unifying perspective. *Cell Metab.* **14**, 154–160 (2011).

54. Alam, M. T. *et al.* The metabolic background is a global player in *Saccharomyces* gene expression epistasis. *Nat Microbiol* **1**, 15030 (2016).

55. Bárcena, C. *et al.* Methionine Restriction Extends Lifespan in Progeroid Mice and Alters Lipid and Bile Acid Metabolism. *Cell Rep.* **24**, 2392–2403 (2018).

56. Lee, B. C. *et al.* Methionine restriction extends lifespan of *Drosophila melanogaster* under conditions of low amino-acid status. *Nat. Commun.* **5**, 3592 (2014).

57. Plummer, J. D. & Johnson, J. E. Extension of Cellular Lifespan by Methionine Restriction Involves Alterations in Central Carbon Metabolism and Is Mitophagy-Dependent. *Front Cell Dev Biol* **7**, 301 (2019).

58. Brind, J. *et al.* Dietary glycine supplementation mimics lifespan extension by dietary methionine restriction in Fisher 344 rats. *The FASEB Journal* **25**, 528.2–528.2 (2011).

59. Ruckenstuhl, C. *et al.* Lifespan extension by methionine restriction requires autophagy-dependent vacuolar acidification. *PLoS Genet.* **10**, e1004347 (2014).

60. Orentreich, N., Matias, J. R., DeFelice, A. & Zimmerman, J. A. Low methionine ingestion by rats extends life span. *J. Nutr.* **123**, 269–274 (1993).
61. Vowinckel, J. *et al.* Cost-effective generation of precise label-free quantitative proteomes in high-throughput by microLC and data-independent acquisition. *Sci. Rep.* **8**, 4346 (2018).
62. Demichev, V., Messner, C. B., Vernardis, S. I., Lilley, K. S. & Ralser, M. DIA-NN: neural networks and interference correction enable deep proteome coverage in high throughput. *Nat. Methods* **17**, 41–44 (2020).
63. Ghaemmaghami, S. *et al.* Global analysis of protein expression in yeast. *Nature* **425**, 737–741 (2003).
64. Våremo, L., Nielsen, J. & Nookaew, I. Enriching the gene set analysis of genome-wide data by incorporating directionality of gene expression and combining statistical hypotheses and methods. *Nucleic Acids Res.* **41**, 4378–4391 (2013).
65. Lin, S.-J. *et al.* Calorie restriction extends *Saccharomyces cerevisiae* lifespan by increasing respiration. *Nature* **418**, 344–348 (2002).
66. Orlandi, I., Ronzulli, R., Casatta, N. & Vai, M. Ethanol and acetate acting as carbon/energy sources negatively affect yeast chronological aging. *Oxid. Med. Cell. Longev.* **2013**, 802870 (2013).
67. Wei, M. *et al.* Tor1/Sch9-regulated carbon source substitution is as effective as calorie restriction in life span extension. *PLoS Genet.* **5**, e1000467 (2009).
68. Shafer, M. E. R. Cross-Species Analysis of Single-Cell Transcriptomic Data. *Front Cell Dev Biol* **7**, 175 (2019).
69. Evers, T. M. J. *et al.* Deciphering Metabolic Heterogeneity by Single-Cell Analysis. *Anal. Chem.* **91**, 13314–13323 (2019).
70. Xiao, Z., Dai, Z. & Locasale, J. W. Metabolic landscape of the tumor microenvironment at single cell resolution. *Nat. Commun.* **10**, 3763 (2019).
71. Zelezniak, A. *et al.* Metabolic dependencies drive species co-occurrence in diverse microbial communities. *Proc. Natl. Acad. Sci. U. S. A.* **112**, 6449–6454 (2015).



72. Kouzuma, A., Kato, S. & Watanabe, K. Microbial interspecies interactions: recent findings in syntrophic consortia. *Front. Microbiol.* **6**, 477 (2015).
73. Kundu, P., Manna, B., Majumder, S. & Ghosh, A. Species-wide Metabolic Interaction Network for Understanding Natural Lignocellulose Digestion in Termite Gut Microbiota. *Sci. Rep.* **9**, 16329 (2019).
74. Zengler, K. & Zaramela, L. S. The social network of microorganisms - how auxotrophies shape complex communities. *Nat. Rev. Microbiol.* **16**, 383–390 (2018).
75. Thompson, L. R. *et al.* A communal catalogue reveals Earth’s multiscale microbial diversity. *Nature* **551**, 457–463 (2017).
76. Váchová, L. & Palková, Z. Aging and longevity of yeast colony populations: metabolic adaptation and differentiation. *Biochem. Soc. Trans.* **39**, 1471–1475 (2011).
77. Brosnan, J. T. & Brosnan, M. E. The sulfur-containing amino acids: an overview. *J. Nutr.* **136**, 1636S–1640S (2006).
78. Dong, Z., Sinha, R. & Richie, J. P., Jr. Disease prevention and delayed aging by dietary sulfur amino acid restriction: translational implications. *Ann. N. Y. Acad. Sci.* **1418**, 44–55 (2018).
79. Sanderson, S. M., Gao, X., Dai, Z. & Locasale, J. W. Methionine metabolism in health and cancer: a nexus of diet and precision medicine. *Nat. Rev. Cancer* **19**, 625–637 (2019).
80. Gao, X. *et al.* Dietary methionine influences therapy in mouse cancer models and alters human metabolism. *Nature* **572**, 397–401 (2019).
81. Udom, N., Chansongkrow, P., Charoensawan, V. & Auesukaree, C. Coordination of the Cell Wall Integrity and High-Osmolarity Glycerol Pathways in Response to Ethanol Stress in *Saccharomyces cerevisiae*. *Appl. Environ. Microbiol.* **85**, (2019).
82. Aman, Y. *et al.* Autophagy in healthy aging and disease. *Nat Aging* **1**, 634–650 (2021).
83. Moger-Reischer, R. Z. & Lennon, J. T. Microbial ageing and longevity. *Nat. Rev. Microbiol.* **17**, 679–690 (2019).
84. Thomas D & Surdin-Kerjan Y. Metabolism of sulfur amino acids in *Saccharomyces*



- cerevisiae. *Microbiol. Mol. Biol. Rev.* **61**, 503–532 (1997).
85. Mülleder, M., Campbell, K., Matsarskaia, O., Eckerstorfer, F. & Ralser, M. Saccharomyces cerevisiae single-copy plasmids for auxotrophy compensation, multiple marker selection, and for designing metabolically cooperating communities. *F1000Res.* **5**, 2351 (2016).
86. Gietz, R. D. & Schiestl, R. H. High-efficiency Yeast Transformation Using the LiAc/SS Carrier DNA/PEG Method. *Nat. Protoc.* **2**, (2007).
87. Sprouffske, K. & Wagner, A. Growthcurver: an R package for obtaining interpretable metrics from microbial growth curves. *BMC Bioinformatics* **17**, 172 (2016).
88. Longo, V. D., Shadel, G. S., Kaeberlein, M. & Kennedy, B. Replicative and chronological aging in Saccharomyces cerevisiae. *Cell Metab.* **16**, 18–31 (2012).
89. Romila, C. A. *et al.* Barcode Sequencing and a High-throughput Assay for Chronological Lifespan Uncover Ageing-associated Genes in Fission Yeast. *Cold Spring Harbor Laboratory* 2021.03.04.433786 (2021) doi:10.1101/2021.03.04.433786.
90. Kamrad, S. *et al.* Pyphe, a python toolbox for assessing microbial growth and cell viability in high-throughput colony screens. *Elife* **9**, (2020).
91. Bligh, E. G. & Dyer, W. J. A rapid method of total lipid extraction and purification. *Can. J. Biochem. Physiol.* **37**, 911–917 (1959).
92. R Core Team. *R: A language and environment for statistical computing*. (R Foundation for Statistical Computing, 2015).
93. Mo, M. L., Palsson, B. Ø. & Herrgård, M. J. Connecting extracellular metabolomic measurements to intracellular flux states in yeast. *BMC Syst. Biol.* **3**, 37 (2009).
94. Szappanos, B. *et al.* An integrated approach to characterize genetic interaction networks in yeast metabolism. *Nat. Genet.* **43**, (2011).
95. Heirendt, L. *et al.* Creation and analysis of biochemical constraint-based models using the COBRA Toolbox v.3.0. *Nat. Protoc.* **14**, 639–702 (2019).
96. Ritchie, M. E. *et al.* limma powers differential expression analyses for RNA-sequencing and microarray studies. *Nucleic Acids Res.* **43**, e47 (2015).

97. Carlson, M. *org.Sc.sgd.db: Genome wide annotation for Yeast. R package version 3.8.2.* (2019).
98. Cherry, J. M. *et al.* Saccharomyces Genome Database: the genomics resource of budding yeast. *Nucleic Acids Res.* **40**, D700–5 (2012).
99. Kanehisa, M., Sato, Y., Kawashima, M., Furumichi, M. & Tanabe, M. KEGG as a reference resource for gene and protein annotation. *Nucleic Acids Res.* **44**, D457–62 (2016).
100. Darzi, Y., Letunic, I., Bork, P. & Yamada, T. iPath3.0: interactive pathways explorer v3. *Nucleic Acids Res.* **46**, W510–W513 (2018).
101. Perez-Riverol, Y. *et al.* The PRIDE database and related tools and resources in 2019: improving support for quantification data. *Nucleic Acids Res.* **47**, D442–D450 (2019).

# 1099 **Figures**

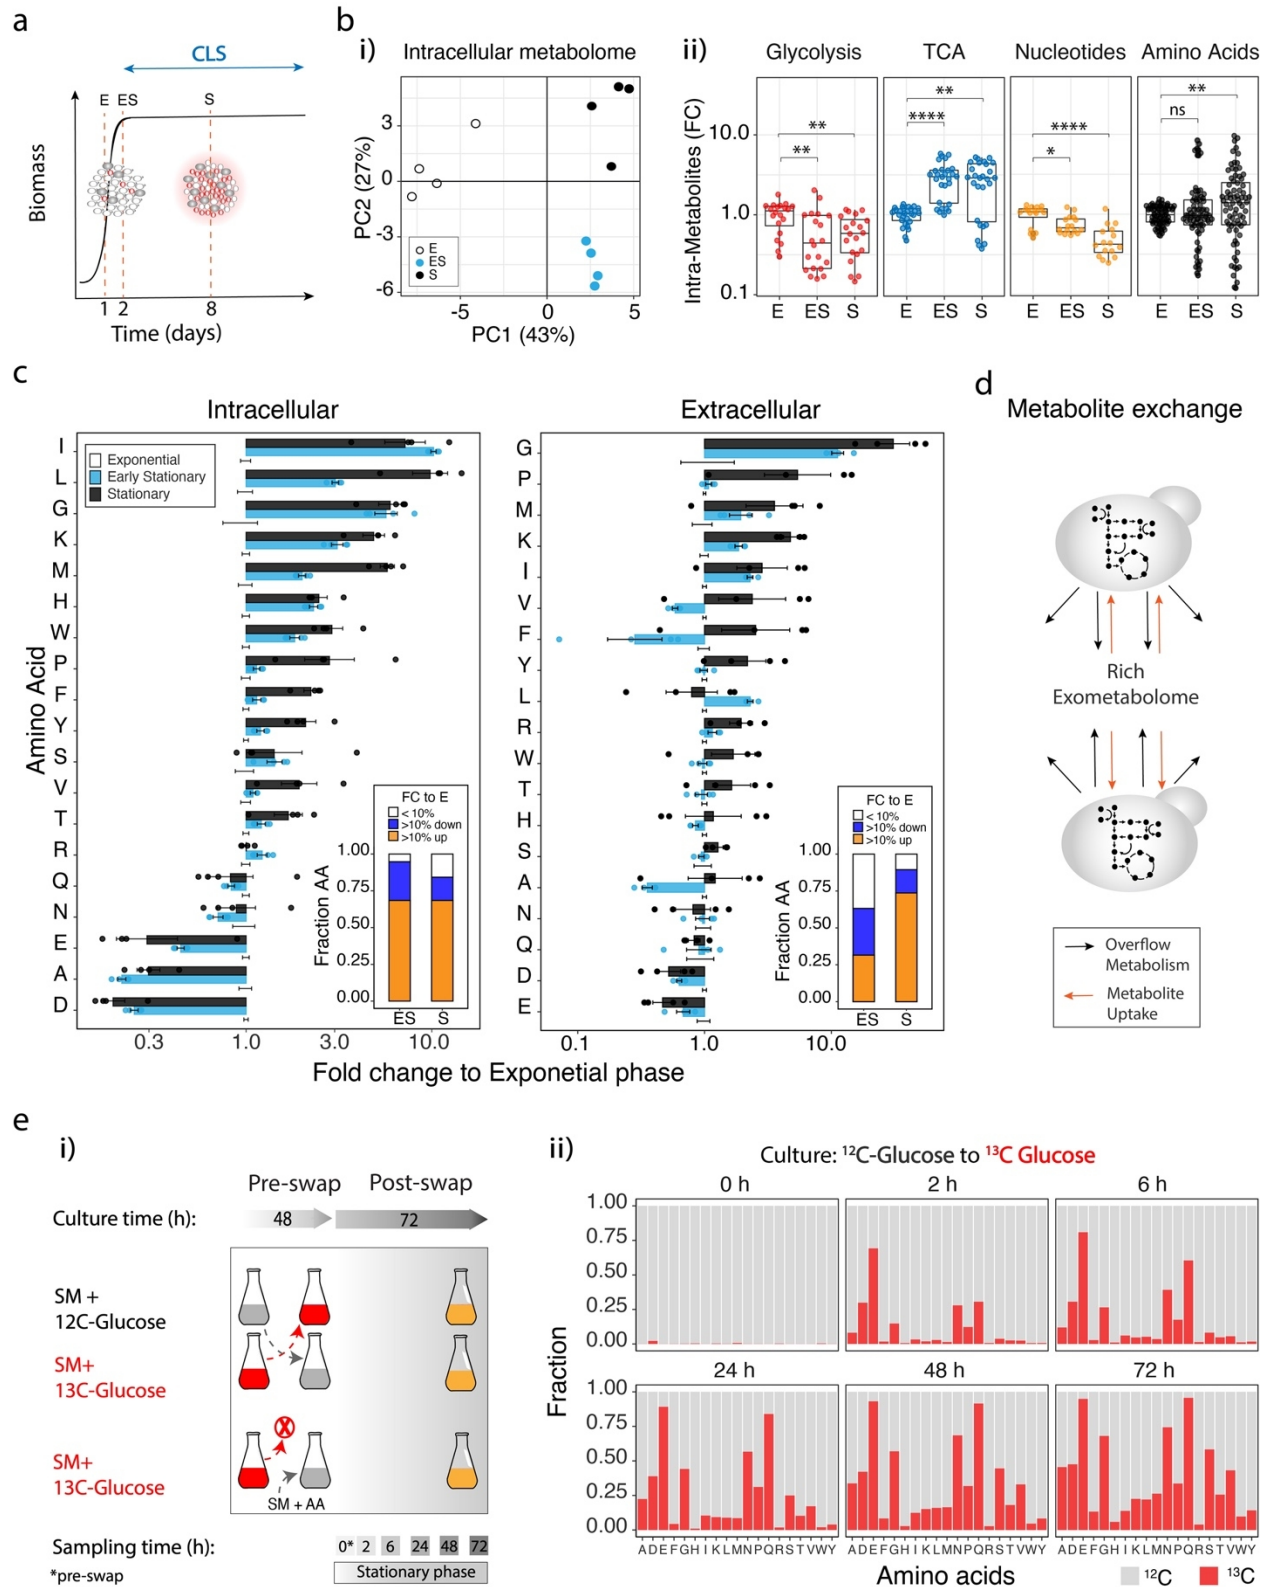

1100

1101

**Figure 1. Metabolites exported by exponentially growing yeast cells are imported by chronologically ageing cells in the stationary phase.** **a)** Scheme: Growth phases of yeast in batch culture, and the measurement of chronological lifespan (CLS) as survival in the stationary phase. (E) exponential growth phase, (ES) early stationary phase and (S) stationary phase. Red dotted lines indicate the time points of sample collection for metabolomic analysis (1, 2 and 8 days from culture start, indicating E, ES and S phases). **b)** Targeted intracellular metabolome (intra-metabolome) analysis for the quantification of nucleotides, amino acids, glycolysis and tricarboxylic acid cycle (TCA) metabolites, in wild-type yeast cells cultured in synthetic minimal (SM) medium at 1 (E), 2 (ES) and 8 (S) days from culture start, respectively. **i)** Principal component analysis (PCA) reflects metabolomic differences between E, ES and S growth phases. Data are n=4 independent cultures (individual dots represent independent cultures). **ii)** Intracellular metabolite concentrations shown as fold change (FC to exponential phase) of different metabolites according to metabolite classes in the different growth phases. Concentration of each metabolite was first normalised by biomass, as assessed by OD<sub>600</sub>. Box plots represent median (50% quantile, middle line) and lower and upper quantiles (lower (25% quantile) and upper (75% quantile), respectively) of pooled metabolite levels of 4 independent cultures. Each dot represents a metabolite in a biological replicate. Statistics by unpaired two-sided Wilcoxon Rank Sum test and multiple testing correction using the BH method; adjusted p-values \*<0.05, \*\*<0.005, \*\*\*<0.0005 and \*\*\*\*<0.00005; adjusted p-values are listed in **Supplementary File 1**. **c)** Intracellular and extracellular amino acids levels in wild-type cultures during exponential (E), early stationary (ES) and stationary (S) phases. Bar plots show mean±SEM fold change (FC to levels in the exponential phase) of n = 4 independent wild-type yeast cultures. Statistics by unpaired two-sided Wilcoxon Rank Sum test and multiple testing correction using the BH method; adjusted p-values are listed in **Supplementary File 2**. Insets represent the fraction of amino acids (from a total of 19) that show minimal changes, are decreased or increased in the FC to exponential phase (E), as shown by FC<10%, FC >10% down and FC>10% up, respectively. **d)** Scheme: Cells synthesise metabolites, following the stoichiometric rules of the metabolic network, wherein some metabolites are exported in order to maintain metabolic homeostasis (overflow metabolism), contributing to the metabolic enrichment of the extracellular environment (rich-exometabolome). At the same time, cells can sense and import metabolites from the surrounding environment. These dynamic export/import properties result in the exchange of metabolites between co-growing cells and the establishment of intercellular metabolic interactions. **e) i)** Scheme: Isotope tracing

experimental design. Prototrophic yeast cells were grown in SM media supplemented either with  $^{12}\text{C}$ -glucose or  $^{13}\text{C}$ -glucose, during 48 hours, then the media was swapped for isotope tracing amino acid analysis using targeted metabolomics by HPLC-MS/MS<sup>50</sup>, at 2, 6, 24, 48 and 72 hours post media swap (plus a control 0 h collection, just prior swapping media). Control cultures were swapped from SM supplemented with  $^{13}\text{C}$ -glucose to SM solely supplemented with  $^{12}\text{C}$ -amino acids (AA) at standard culturing concentrations (see Methods). **ii)** Fractions of  $^{12}\text{C}$  and  $^{13}\text{C}$  labelled amino acids in cultures initially grown in SM +  $^{12}\text{C}$ -glucose and swapped to  $^{13}\text{C}$ -glucose, at different time points post media swap, as described in i). Data represents the mean of 4 independent cultures; Individual fraction values are listed in **Supplementary File 3**.

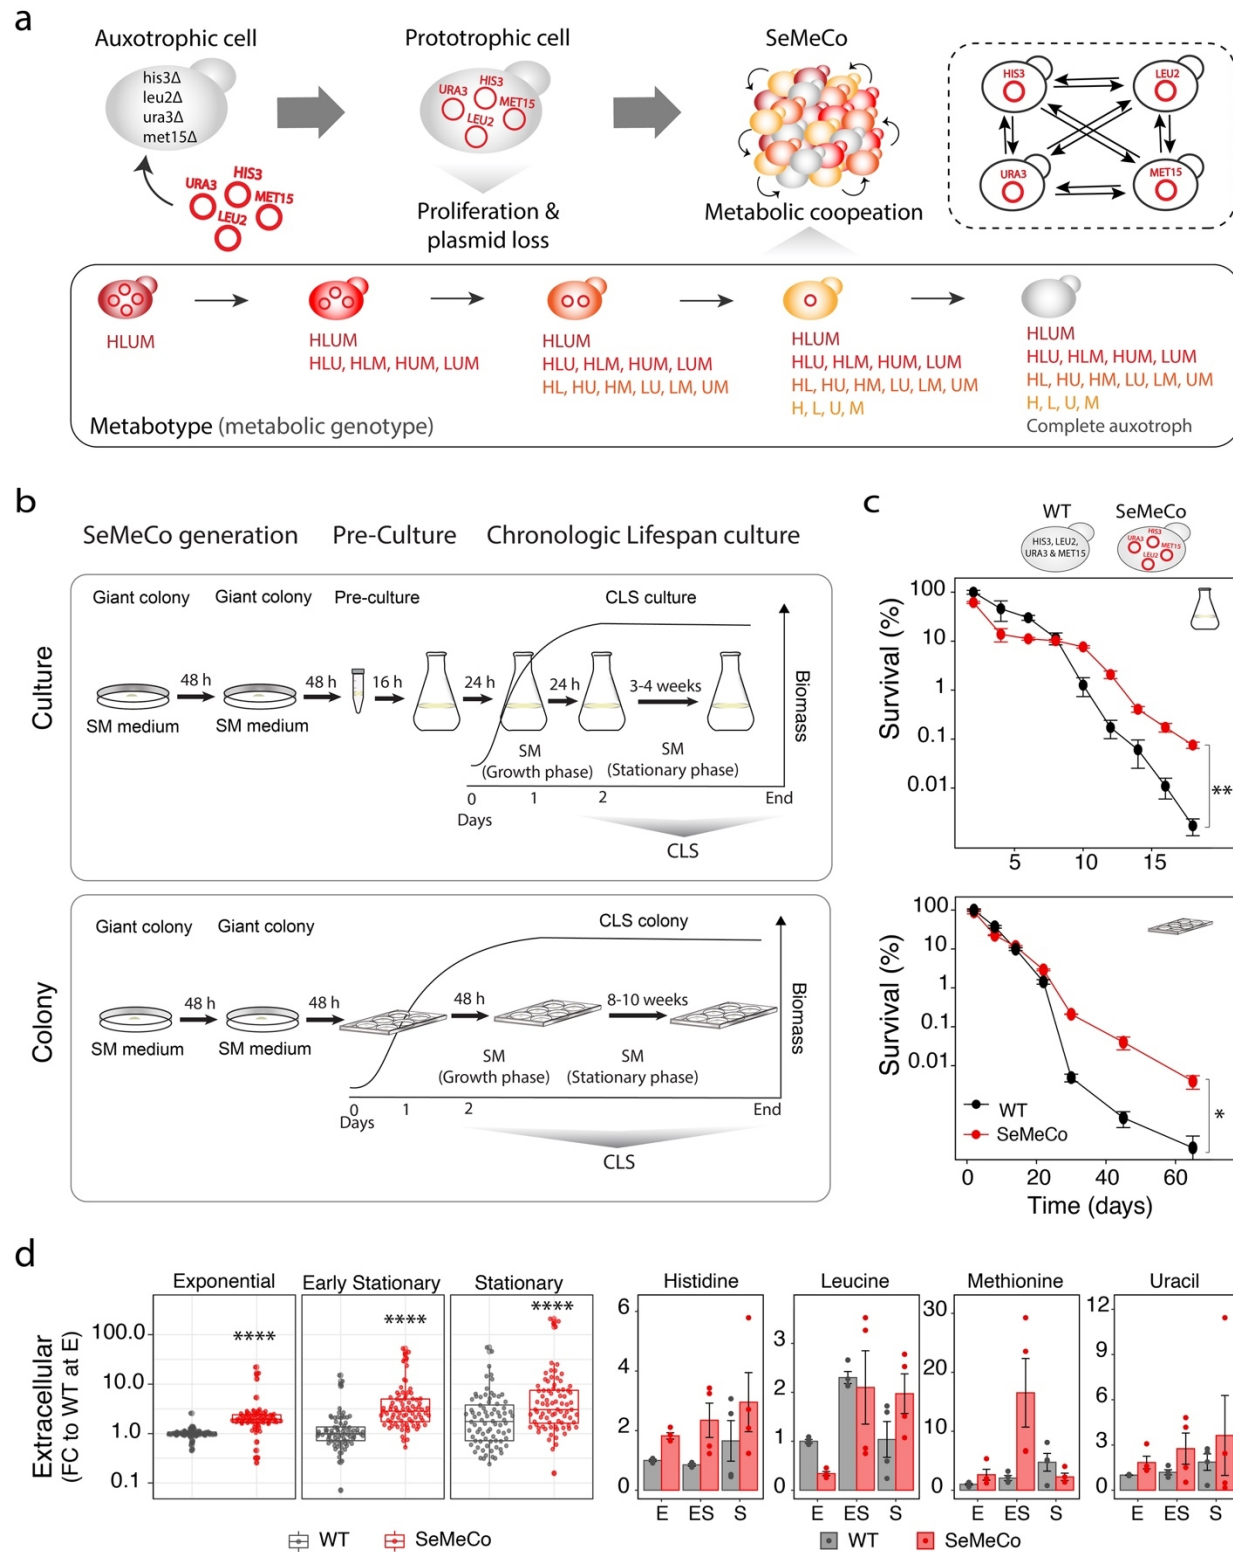

**Figure 2. Boosting Metabolite exchange interactions extends chronological lifespan** a) Scheme:

Self-establishing metabolically cooperating communities (SeMeCos) maximise metabolite exchange

interactions through the segregation of plasmid-encoded auxotrophic markers. The SeMeCo system starts with a prototrophic cell that carries four essential metabolic markers on centromeric metastable plasmids (*pHIS3*, *pLEU2*, *pMET15* and *pURA3*) instead of stable integration in the genome (prototrophic wild-type). When these cells grow into a community, the stochastic plasmid segregation leads to an increasing number of auxotrophs that continue to proliferate on the basis of metabolites produced by other cells. Segregation continues until a maximum number of auxotrophs that the community can maintain is reached. Sixteen different metabotypes (metabolic genotypes) can arise from the differential segregation of the four metabolic markers. **b)** Chronological lifespan (CLS) of wild-type and SeMeCo communities grown in liquid SM media cultures, start by spotting giant colonies twice to ensure cell proliferation, plasmid segregation and ultimately cross-feeding between auxotrophs and prototrophs (SeMeCos generation), followed by pre-culture and culture, set at high cellular density (assessed by OD<sub>600</sub>) to minimally disturb the composition of SeMeCos in conditions of unsupplemented media. (bottom) CLS of cells grown in a colony follow the same initial SeMeCo generation before re-spotting giant colonies into 6-well plates containing solid SM media. Samples are collected at different time points for survival assessment. **c)** (top) Culture and (bottom) colony CLS analysis assessing survival of wild-type and SeMeCos. Survival was evaluated using colony forming units (CFU) analysis, normalised to biomass (see Methods). Data are mean±SEM survival (percentage fold change) compared to wild-type mean survival at the beginning of stationary phase (48h culture); n = 4 independent cultures per strain (Culture CLS) or n = 3 independent colonies per strain (Colony CLS). Statistics using unpaired two-sided *t*-test, p-value = 0.00661 at day 18 of culture and p-value = 0.0338 at day 65 in the colony; p-values across CLSs are listed in **Supplementary File 4**. **d)** Extracellular amino acids and uracil levels, measured by HPLC-MS/MS<sup>50</sup>, in wild-type and SeMeCos cultures during exponential (E), early stationary (ES) and stationary (S) phases. Data are individual metabolite fold-change (FC to mean wild-type levels in the exponential phase) of n = 4 independent cultures per strain. Data comparing wild-type values from Fig 1c; samples were cultured, extracted and measured in parallel. Concentration of each metabolite was first normalised to biomass, as assessed by OD<sub>600</sub>. (left) Box plots showing overall metabolite FC distribution over time; box plots represent median (50% quantile, middle line) and lower and upper quantiles (lower (25% quantile) and upper (75% quantile)). (right) Bar plots show the mean±SEM FC of the shared metabolites (HLUM) in SeMeCos over time. Statistics by unpaired two-sided Wilcoxon Rank Sum test and multiple



1176 testing correction using the BH method; adjusted p-value  $^*<0.05$ ,  $^{**}<0.005$ ,  $^{***}<0.0005$  and  $^{****}<0.00005$ ;

1177 adjusted p-values are listed in **Supplementary File 6**.

1178

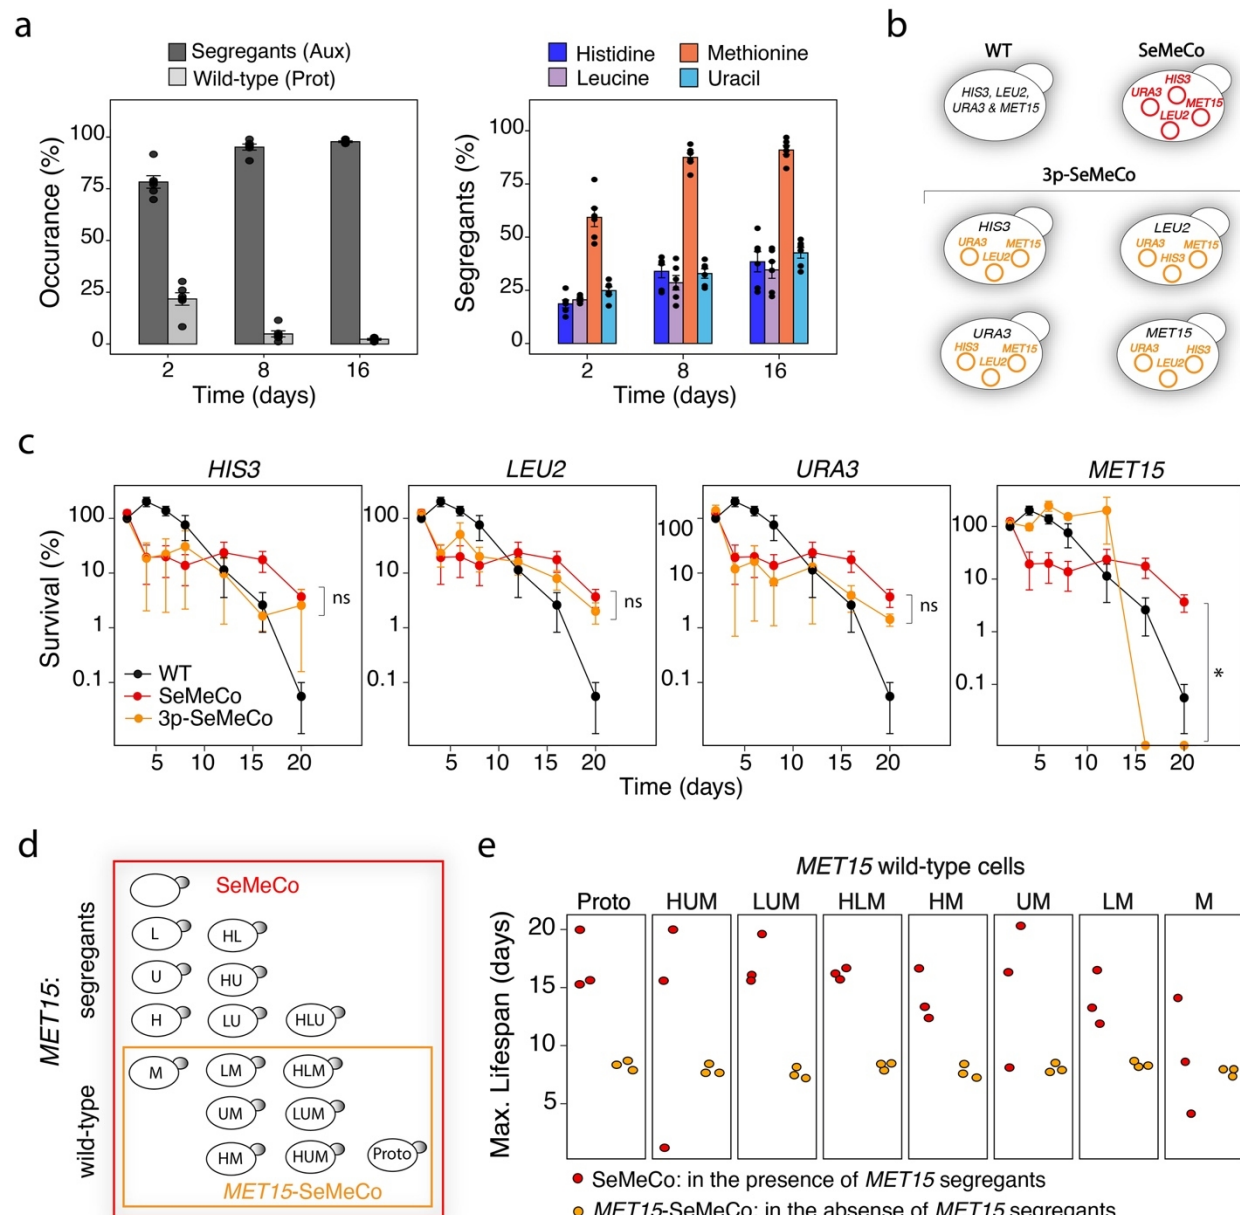

**Figure 3. Metabolic interactions between *MET15* and  $\Delta met15$  cells promote a paracrine lifespan extension of SeMeCo communities** **a)** (left) Frequency of overall segregant cells (at least one auxotrophy for H, L, U and/or M) and genetically prototrophic (bearing the four wild-type locus) cells during CLS. (right) Frequency of the individual segregants, i.e. per auxotrophy for H, L, U or M over time. Bar plots show the mean $\pm$ SEM of n=6 independent SeMeCo cultures across 2 independent experiments (dots represent independent cultures). Statistics by paired two-sided *t*-test; p-values listed in **Supplementary File 7**. The proportion of all auxotrophs increases, with  $\Delta met15$  segregants becoming

1189 the most abundant metabotype during CLS. **b)** Schematics: Wild-type, SeMeCos and four '3p-SeMeCos',  
1190 in which one of the markers (*HIS3*, *LEU2*, *MET15* or *URA3*) is genomically integrated and does no longer  
1191 segregate. **c)** Survival percentage of wild-type, SeMeCos and 3p-SeMeCos during CLS (assessed by  
1192 high-throughput CFU (HTP-CFU) normalised per biomass). Data are mean±SEM survival (percentage  
1193 fold change) compared to wild-type mean survival at the beginning of stationary phase (48h culture); n=4  
1194 independent cultures per strain. Survival curves are shown separately for each 3p-SeMeCos for  
1195 visualisation purposes (all strains were cultured and analysed in parallel). Statistics by unpaired two-sided  
1196 Wilcoxon Rank Sum test; p-value at day 20 of culture for: SeMeCo vs wt = 0.0294 SeMeCo vs *HIS3*-  
1197 SeMeCo = 0.3428, SeMeCo vs *LEU2*-SeMeCo = 0.3428, SeMeCo vs *URA3*-SeMeCo = 0.2000, SeMeCo  
1198 vs *MET15*-SeMeCo = 0.0210; p-values across CLSs are listed in **Supplementary File 8**. **d)** The  
1199 segregation of the four metabolic markers gives rise to 16 different metabotypes, eight of which have  
1200 segregated the *MET15* plasmid (Fig. 2a). **e)** Maximum lifespan of the eight *MET15* wild-type  
1201 metabotypes, in the presence (SeMeCo, red) or absence (*MET15*-SeMeCo, yellow) of *MET15*  
1202 segregants. Dots are independent cultures per SeMeco type. Data are from n=3 independent cultures per  
1203 SeMeCo. Statistics by unpaired one-sided Wilcoxon Rank Sum test; p-values in **Supplementary File 11**.

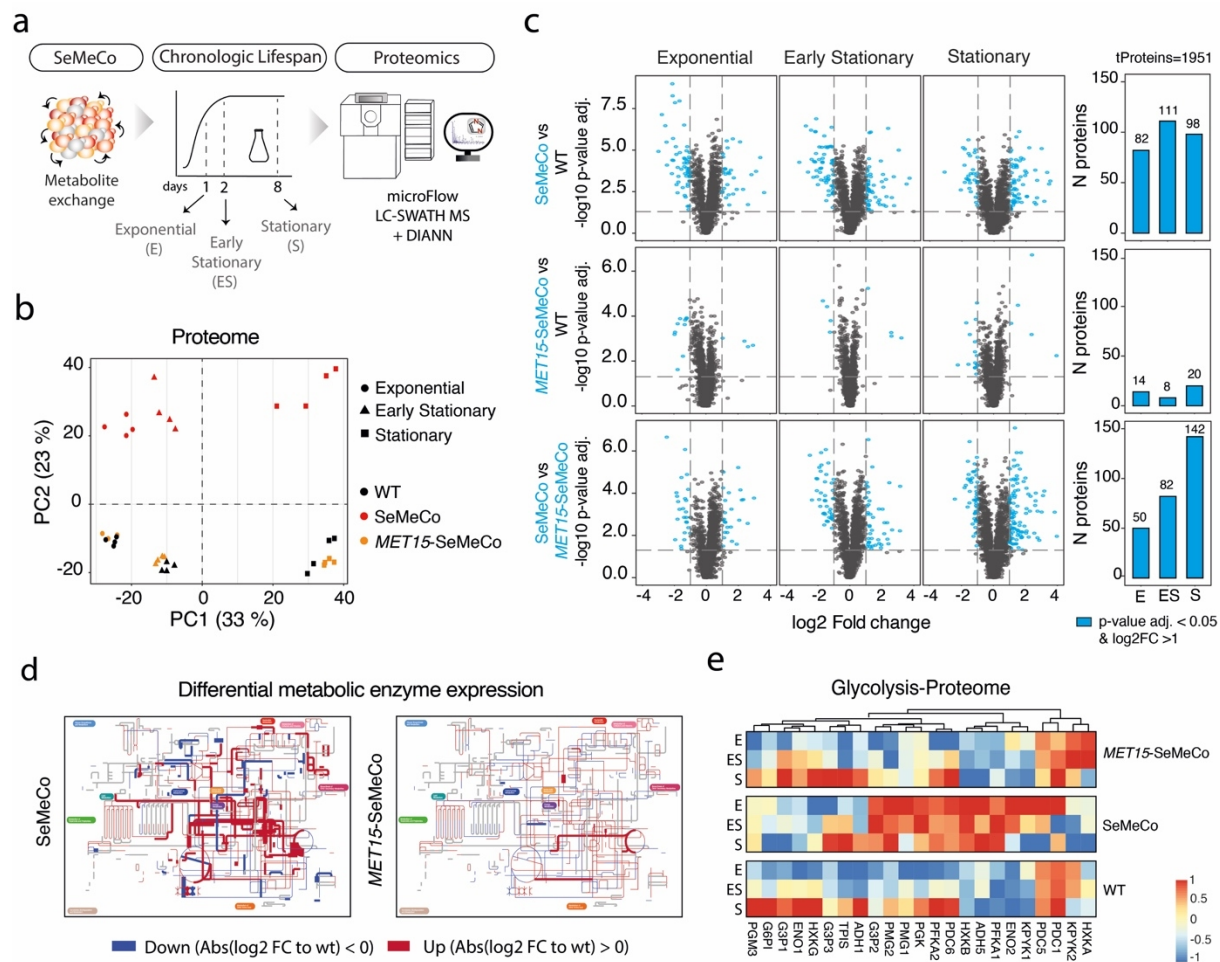

**Figure 4. Widespread proteome and metabolome changes in yeast communities where *MET15* and *met15Δ* cells interact.** **a)** Wild-type, SeMeCos, and *MET15*-SeMeCos (that do not segregate the *MET15* marker) cells were collected at exponential (E), early stationary (ES) and stationary (S) growth phases. Proteomes were analysed using micro-flow LC-SWATH MS<sup>61</sup> and DIA-NN<sup>62</sup>. Proteomics analysis was performed on four independent cultures (biological replicates) per yeast strain (total n=12 cultures). **b)** Principal component analysis (PCA) reveals that major proteome changes are driven by the transition from exponential to stationary phase (PC1, 33%) and the segregation of the *MET15* marker (PC2, 23%). Individual data points represent biological replicates per strain. **c)** Volcano plots illustrate differential protein expression as log2 fold change (FC) to wild-type expression levels and -log10 adjusted p-value by BH method. Blue dots denote proteins above an absolute log2 FC of 1 (vertical dashed lines) and adjusted p-value < 0.05 (horizontal dashed line) (left), with total number of proteins defined as per blue dots represented as bar graphs (right), per growth phase and pairwise comparison. Statistics by unpaired two-sided *t*-test and multiple testing correction using the BH method; adjusted p-values are

1219 listed in **Supplementary File 13. d)** Differential metabolic enzyme expression levels, from proteome  
 1220 analysis in a), mapped to the yeast metabolic network using IPATH3<sup>100</sup> in the early stationary phase  
 1221 (exponential and stationary phases are shown in Supplemental Fig. 13). Red and blue lines represent  
 1222 significantly (BH adjusted p-value <0.05) up- or down-regulated proteins in SeMeCos and *MET15*-  
 1223 SeMeCos when compared to wild-type; grey lines represent non-mapped/absent proteins in the  
 1224 measured proteomes. Thickness of the lines represent absolute log2 fold change (Abs(log2FC)) changes  
 1225 (thickening = increased Abs(log2FC)). **e)** Expression of enzymes belonging to the glycolysis pathway  
 1226 (columns), derived from the proteome analysis in a) and normalised to a -1 to 1 scale, per growth phase

1227 and yeast communities (rows).

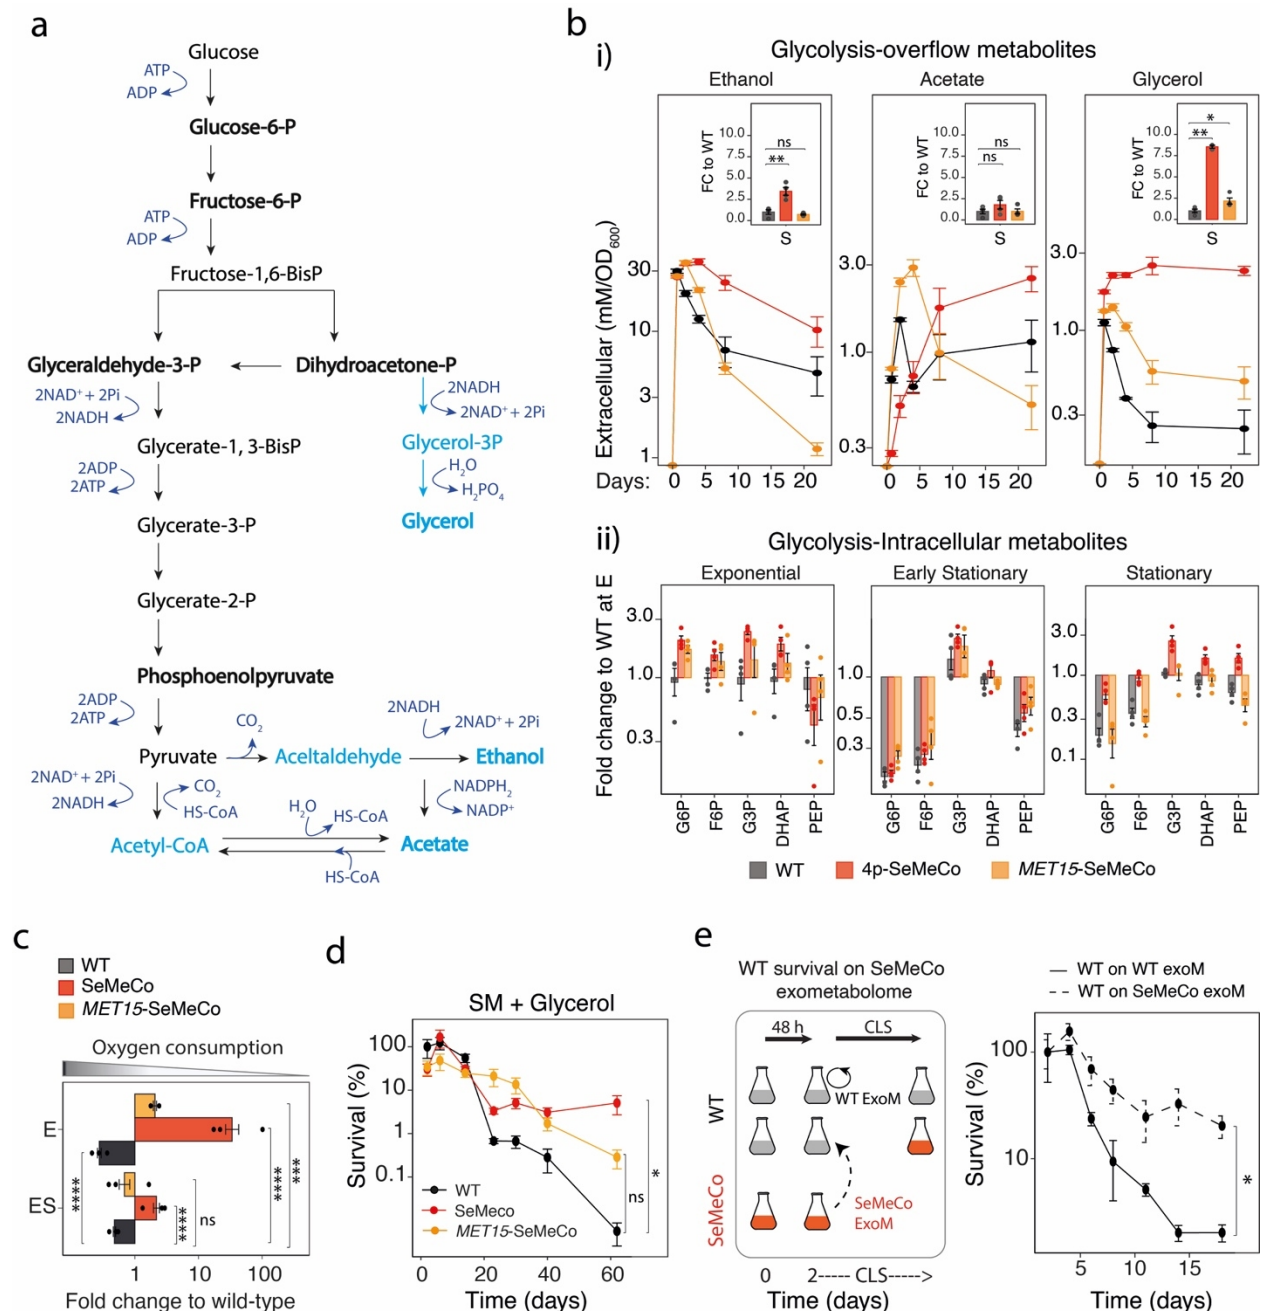

**Figure 5. Lifespan extension in SeMeCos is promoted by a self-generated protective exometabolome.** **a)** Fermentation (light blue) and glycolysis (black) reaction scheme and associated metabolites **b)** Quantification of **i)** the glycolytic overflow metabolites ethanol, acetate and glycerol in the exometabolome (by HPLC) and **ii)** intracellular glycolytic intermediates (by HPLC-MS/MS) of wild-type, SeMeCos, and *MET15*-SeMeCos that do not segregate the *MET15* gene (top). Data are mean±SEM

1234 metabolite levels (mM, normalised to biomass (OD<sub>600</sub>)); n= 4 independent cultures per strain (total n = 12  
1235 cultures). Insets in i) indicate fold change (FC) to mean wild type levels in the stationary phase (S, day 8);  
1236 individual dots represent independent cultures. Statistics by unpaired two-sided *t*-test; ns= not statistically  
1237 significant, p-values \* $<0.05$ , \*\* $<0.005$ ; p-values are listed in **Supplementary File 15. c)** Oxygen (O<sub>2</sub>)  
1238 consumption, as measured by O<sub>2</sub> saturation in culture post 5 minutes of O<sub>2</sub> levels recording (using a  
1239 Hanna HI oxygen meter), in wild-type, SeMeCos, and *MET15*-SeMeCos, that do not segregate the  
1240 *MET15* gene, cultures in exponential (E) and early stationary (ES) growth phases. O<sub>2</sub> levels were  
1241 normalised to biomass, as measured by OD<sub>600</sub>, and to mean levels of wild-type in exponential phase.  
1242 Data are mean $\pm$ SEM fold change to wild-type mean levels in stationary phase, n=3 independent cultures  
1243 per strain (total n=9 cultures). Statistics by unpaired two-sided Wilcoxon Rank Sum test; p-values are  
1244 listed in **Supplementary File 16. d)** Chronologic lifespan assay, shown as survival measured by HTP-  
1245 CFU normalised to biomass, of wild-type communities, SeMeCos, and *MET15*-SeMeCos, cultured on SM  
1246 supplemented with glycerol. Data are mean $\pm$ SEM survival (percentage fold change) compared to mean  
1247 wild-type survival at the beginning of stationary phase (48h culture); n = 4 independent cultures/ strain  
1248 (total n=12 cultures). Statistics by unpaired two-sided Wilcoxon Rank Sum test; p-value at day 62 of  
1249 culture for wt vs SeMeCos = 0.0285 and wt vs *MET15*-SeMeCos = 0.1142, p-values across CLS are  
1250 listed in **Supplementary File 17. e)** Chronologic lifespan assay, shown as survival measured by HTP-  
1251 CFU normalised to biomass, in wild-type cultures swapped to SeMeCos culture media (SeMeCo  
1252 exometabolome (exoM)) or kept in their culture media (WT exoM) at the start of stationary phase (48h of  
1253 growth). Data are mean $\pm$ SEM survival (percentage fold change) compared to mean wild-type survival at  
1254 the beginning of stationary phase (48h culture); n=4 independent cultures per exoM. Statistics by  
1255 unpaired two-sided Wilcoxon Rank Sum test; p-value =0.0286 at day 18 of culture; p-values across CLS  
1256 are listed in **Supplementary File 18.**
